# Supplementary material for: On the Trail of Tetu1: Genome-Wide Discovery of CACTA Transposable Elements in Sunflower Genome
Source: MDPI journal article supplement (doi:10.3390/ijms21062021), 2020-03-16
Supplement: s1 [file s1]

# Supplementary material 4

The classification of the CACTA elements identified was verified using another phylogenetic analysis tool (iqTree <http://www.iqtree.org/>) using default parameters.

IQ-TREE 1.6.11 built Jun 6 2019

Input file name: 347.fa

Type of analysis: ModelFinder + tree reconstruction + ultrafast bootstrap (1000 replicates)

Random seed number: 627311

## REFERENCES

-----

To cite ModelFinder please use:

Subha Kalyaanamoorthy, Bui Quang Minh, Thomas KF Wong, Arndt von Haeseler, and Lars S Jermiin (2017) ModelFinder: Fast model selection for accurate phylogenetic estimates. *Nature Methods*, 14:587–589.  
<https://doi.org/10.1038/nmeth.4285>

To cite IQ-TREE please use:

Lam-Tung Nguyen, Heiko A. Schmidt, Arndt von Haeseler, and Bui Quang Minh (2015) IQ-TREE: A fast and effective stochastic algorithm for estimating maximum likelihood phylogenies. *Mol Biol Evol*, 32:268-274.  
<https://doi.org/10.1093/molbev/msu300>

Since you used ultrafast bootstrap (UFBoot) please also cite:

Diep Thi Hoang, Olga Chernomor, Arndt von Haeseler, Bui Quang Minh, and Le Sy Vinh (2017) UFBoot2: Improving the ultrafast bootstrap approximation. *Mol Biol Evol*, in press.  
<https://doi.org/10.1093/molbev/msx281>

## SEQUENCE ALIGNMENT

-----

Input data: 347 sequences with 779 nucleotide sites

Number of constant sites: 217 (= 27.8562% of all sites)

Number of invariant (constant or ambiguous constant) sites: 217 (= 27.8562% of all sites)

Number of parsimony informative sites: 501

Number of distinct site patterns: 641

# ModelFinder

-----

Best-fit model according to BIC: TVM+F+I+G4

List of models sorted by BIC scores:

| Model        | LogL        | AIC                 | w-AIC               | AICc                | w-AICc              | BIC | w-BIC |
|--------------|-------------|---------------------|---------------------|---------------------|---------------------|-----|-------|
| TVM+F+I+G4   |             | -24007.5878         | 49411.1756 + 0.7238 | 61608.7256 - 0.0000 | 52662.4673 + 0.9611 |     |       |
| GTR+F+I+G4   |             | -24007.5511         | 49413.1021 + 0.2762 | 61800.4439 - 0.0000 | 52669.0518 - 0.0357 |     |       |
| K3Pu+F+I+G4  |             | -24020.3164         | 49432.6328 - 0.0000 | 61264.6328 - 0.0000 | 52674.6085 - 0.0022 |     |       |
| TPM3+F+I+G4  |             | -24021.9289         | 49435.8577 - 0.0000 | 61267.8577 - 0.0000 | 52677.8334 - 0.0004 |     |       |
| TPM3u+F+I+G4 |             | -24021.9290         | 49435.8580 - 0.0000 | 61267.8580 - 0.0000 | 52677.8337 - 0.0004 |     |       |
| TIM+F+I+G4   | -24020.2996 | 49434.5993 - 0.0000 | 61447.0931 - 0.0000 | 52681.2330 - 0.0001 |                     |     |       |
| TIM3+F+I+G4  | -24021.8559 | 49437.7119 - 0.0000 | 61450.2057 - 0.0000 | 52684.3456 - 0.0000 |                     |     |       |
| TVM+F+G4     | -24021.8742 | 49437.7483 - 0.0000 | 61450.2422 - 0.0000 | 52684.3820 - 0.0000 |                     |     |       |
| GTR+F+G4     | -24021.7131 | 49439.4262 - 0.0000 | 61636.9762 - 0.0000 | 52690.7179 - 0.0000 |                     |     |       |
| TPM2u+F+I+G4 |             | -24031.2879         | 49454.5757 - 0.0000 | 61286.5757 - 0.0000 | 52696.5514 - 0.0000 |     |       |
| TPM2+F+I+G4  |             | -24031.2912         | 49454.5824 - 0.0000 | 61286.5824 - 0.0000 | 52696.5581 - 0.0000 |     |       |
| K3Pu+F+G4    | -24035.0534 | 49460.1068 - 0.0000 | 61116.0105 - 0.0000 | 52697.4245 - 0.0000 |                     |     |       |
| HKY+F+I+G4   |             | -24035.5816         | 49461.1632 - 0.0000 | 61117.0668 - 0.0000 | 52698.4809 - 0.0000 |     |       |
| TPM3u+F+G4   |             | -24036.1410         | 49462.2820 - 0.0000 | 61118.1857 - 0.0000 | 52699.5997 - 0.0000 |     |       |
| TPM3+F+G4    |             | -24036.1411         | 49462.2821 - 0.0000 | 61118.1858 - 0.0000 | 52699.5998 - 0.0000 |     |       |
| TIM2+F+I+G4  | -24031.2245 | 49456.4489 - 0.0000 | 61468.9428 - 0.0000 | 52703.0826 - 0.0000 |                     |     |       |
| TIM+F+G4     | -24034.9560 | 49461.9119 - 0.0000 | 61293.9119 - 0.0000 | 52703.8876 - 0.0000 |                     |     |       |
| TN+F+I+G4    | -24035.5681 | 49463.1362 - 0.0000 | 61295.1362 - 0.0000 | 52705.1119 - 0.0000 |                     |     |       |
| TIM3+F+G4    | -24035.9287 | 49463.8574 - 0.0000 | 61295.8574 - 0.0000 | 52705.8331 - 0.0000 |                     |     |       |
| TPM2u+F+G4   |             | -24046.2579         | 49482.5157 - 0.0000 | 61138.4193 - 0.0000 | 52719.8334 - 0.0000 |     |       |
| TPM2+F+G4    |             | -24046.2589         | 49482.5177 - 0.0000 | 61138.4214 - 0.0000 | 52719.8354 - 0.0000 |     |       |
| HKY+F+G4     | -24050.4414 | 49488.8829 - 0.0000 | 60972.9305 - 0.0000 | 52721.5425 - 0.0000 |                     |     |       |
| TIM2+F+G4    | -24046.1967 | 49484.3934 - 0.0000 | 61316.3934 - 0.0000 | 52726.3691 - 0.0000 |                     |     |       |

|            |             |            |          |            |          |            |          |
|------------|-------------|------------|----------|------------|----------|------------|----------|
| TN+F+G4    | -24050.3544 | 49490.7087 | - 0.0000 | 61146.6124 | - 0.0000 | 52728.0264 | - 0.0000 |
| TVMe+I+G4  | -24106.5828 | 49603.1657 | - 0.0000 | 61259.0693 | - 0.0000 | 52840.4834 | - 0.0000 |
| SYM+I+G4   | -24105.5405 | 49603.0810 | - 0.0000 | 61435.0810 | - 0.0000 | 52845.0567 | - 0.0000 |
| TVMe+G4    | -24119.8366 | 49627.6733 | - 0.0000 | 61111.7209 | - 0.0000 | 52860.3329 | - 0.0000 |
| SYM+G4     | -24119.1282 | 49628.2563 | - 0.0000 | 61284.1599 | - 0.0000 | 52865.5740 | - 0.0000 |
| TIM3e+I+G4 | -24148.9243 | 49685.8486 | - 0.0000 | 61169.8962 | - 0.0000 | 52918.5082 | - 0.0000 |
| TIM2e+I+G4 | -24153.3377 | 49694.6755 | - 0.0000 | 61178.7231 | - 0.0000 | 52927.3351 | - 0.0000 |
| TIM3e+G4   | -24162.4044 | 49710.8087 | - 0.0000 | 61027.0911 | - 0.0000 | 52938.8104 | - 0.0000 |
| TIM2e+G4   | -24168.0232 | 49722.0463 | - 0.0000 | 61038.3287 | - 0.0000 | 52950.0480 | - 0.0000 |
| K3P+I+G4   | -24168.2603 | 49722.5205 | - 0.0000 | 61038.8029 | - 0.0000 | 52950.5222 | - 0.0000 |
| TIMe+I+G4  | -24166.9281 | 49721.8562 | - 0.0000 | 61205.9038 | - 0.0000 | 52954.5159 | - 0.0000 |
| K3P+G4     | -24182.4352 | 49748.8705 | - 0.0000 | 60901.3356 | - 0.0000 | 52972.2141 | - 0.0000 |
| TIMe+G4    | -24181.4779 | 49748.9559 | - 0.0000 | 61065.2382 | - 0.0000 | 52976.9575 | - 0.0000 |
| K2P+I+G4   | -24187.6445 | 49759.2890 | - 0.0000 | 60911.7542 | - 0.0000 | 52982.6327 | - 0.0000 |
| TNe+I+G4   | -24186.3016 | 49758.6032 | - 0.0000 | 61074.8856 | - 0.0000 | 52986.6049 | - 0.0000 |
| K2P+G4     | -24201.8953 | 49785.7906 | - 0.0000 | 60778.2504 | + 1.0000 | 53004.4762 | - 0.0000 |
| TNe+G4     | -24200.9210 | 49785.8420 | - 0.0000 | 60938.3071 | - 0.0000 | 53009.1857 | - 0.0000 |
| F81+F+I+G4 | -24453.2052 | 50294.4105 | - 0.0000 | 61778.4581 | - 0.0000 | 53527.0702 | - 0.0000 |
| F81+F+G4   | -24467.7198 | 50321.4396 | - 0.0000 | 61637.7220 | - 0.0000 | 53549.4413 | - 0.0000 |
| JC+I+G4    | -24592.9869 | 50567.9737 | - 0.0000 | 61560.4335 | - 0.0000 | 53786.6594 | - 0.0000 |
| JC+G4      | -24607.6550 | 50595.3100 | - 0.0000 | 61431.4463 | - 0.0000 | 53809.3376 | - 0.0000 |
| K3Pu+F+I   | -24645.1706 | 50680.3413 | - 0.0000 | 62336.2449 | - 0.0000 | 53917.6589 | - 0.0000 |
| TVM+F+I    | -24639.1124 | 50672.2247 | - 0.0000 | 62684.7186 | - 0.0000 | 53918.8584 | - 0.0000 |
| TIM+F+I    | -24645.1234 | 50682.2468 | - 0.0000 | 62514.2468 | - 0.0000 | 53924.2224 | - 0.0000 |
| GTR+F+I    | -24639.0832 | 50674.1665 | - 0.0000 | 62871.7165 | - 0.0000 | 53925.4582 | - 0.0000 |
| TPM3u+F+I  | -24649.2321 | 50688.4642 | - 0.0000 | 62344.3678 | - 0.0000 | 53925.7818 | - 0.0000 |
| TPM3+F+I   | -24649.2321 | 50688.4642 | - 0.0000 | 62344.3678 | - 0.0000 | 53925.7819 | - 0.0000 |
| TIM3+F+I   | -24649.1853 | 50690.3706 | - 0.0000 | 62522.3706 | - 0.0000 | 53932.3462 | - 0.0000 |
| HKY+F+I    | -24658.4488 | 50704.8976 | - 0.0000 | 62188.9452 | - 0.0000 | 53937.5573 | - 0.0000 |
| TPM2u+F+I  | -24657.7044 | 50705.4088 | - 0.0000 | 62361.3124 | - 0.0000 | 53942.7264 | - 0.0000 |
| TPM2+F+I   | -24657.7054 | 50705.4107 | - 0.0000 | 62361.3144 | - 0.0000 | 53942.7284 | - 0.0000 |
| TN+F+I     | -24658.3996 | 50706.7991 | - 0.0000 | 62362.7028 | - 0.0000 | 53944.1168 | - 0.0000 |
| TIM2+F+I   | -24657.6563 | 50707.3126 | - 0.0000 | 62539.3126 | - 0.0000 | 53949.2883 | - 0.0000 |
| K3Pu+F     | -24738.3373 | 50864.6746 | - 0.0000 | 62348.7222 | - 0.0000 | 54097.3343 | - 0.0000 |
| TVM+F      | -24732.1141 | 50856.2281 | - 0.0000 | 62688.2281 | - 0.0000 | 54098.2038 | - 0.0000 |
| TIM+F      | -24738.1381 | 50866.2762 | - 0.0000 | 62522.1798 | - 0.0000 | 54103.5939 | - 0.0000 |
| TPM3+F     | -24741.6669 | 50871.3338 | - 0.0000 | 62355.3815 | - 0.0000 | 54103.9935 | - 0.0000 |
| TPM3u+F    | -24741.6721 | 50871.3443 | - 0.0000 | 62355.3919 | - 0.0000 | 54104.0039 | - 0.0000 |
| GTR+F      | -24731.9173 | 50857.8347 | - 0.0000 | 62870.3285 | - 0.0000 | 54104.4684 | - 0.0000 |
| TIM3+F     | -24741.4750 | 50872.9501 | - 0.0000 | 62528.8537 | - 0.0000 | 54110.2677 | - 0.0000 |
| HKY+F      | -24751.4078 | 50888.8155 | - 0.0000 | 62205.0979 | - 0.0000 | 54116.8172 | - 0.0000 |
| TPM2+F     | -24751.2001 | 50890.4002 | - 0.0000 | 62374.4478 | - 0.0000 | 54123.0598 | - 0.0000 |
| TPM2u+F    | -24751.2004 | 50890.4008 | - 0.0000 | 62374.4484 | - 0.0000 | 54123.0605 | - 0.0000 |
| TN+F       | -24751.2047 | 50890.4094 | - 0.0000 | 62374.4570 | - 0.0000 | 54123.0690 | - 0.0000 |

|         |             |            |          |            |          |            |          |
|---------|-------------|------------|----------|------------|----------|------------|----------|
| TIM2+F  | -24750.9948 | 50891.9896 | - 0.0000 | 62547.8933 | - 0.0000 | 54129.3073 | - 0.0000 |
| TVMe+I  | -24776.7938 | 50941.5877 | - 0.0000 | 62425.6353 | - 0.0000 | 54174.2473 | - 0.0000 |
| SYM+I   | -24775.3854 | 50940.7709 | - 0.0000 | 62596.6745 | - 0.0000 | 54178.0886 | - 0.0000 |
| TIM3e+I | -24801.3170 | 50988.6339 | - 0.0000 | 62304.9163 | - 0.0000 | 54216.6356 | - 0.0000 |
| K3P+I   | -24807.7410 | 50999.4821 | - 0.0000 | 62151.9472 | - 0.0000 | 54222.8257 | - 0.0000 |
| TIMe+I  | -24806.3703 | 50998.7407 | - 0.0000 | 62315.0230 | - 0.0000 | 54226.7423 | - 0.0000 |
| TIM2e+I | -24809.8684 | 51005.7369 | - 0.0000 | 62322.0192 | - 0.0000 | 54233.7385 | - 0.0000 |
| K2P+I   | -24826.3340 | 51034.6680 | - 0.0000 | 62027.1277 | - 0.0000 | 54253.3536 | - 0.0000 |
| TNe+I   | -24824.9460 | 51033.8920 | - 0.0000 | 62186.3572 | - 0.0000 | 54257.2357 | - 0.0000 |
| TVMe    | -24875.2561 | 51136.5122 | - 0.0000 | 62452.7945 | - 0.0000 | 54364.5138 | - 0.0000 |
| SYM     | -24874.1798 | 51136.3595 | - 0.0000 | 62620.4071 | - 0.0000 | 54369.0192 | - 0.0000 |
| TIM3e   | -24897.4236 | 51178.8471 | - 0.0000 | 62331.3123 | - 0.0000 | 54402.1908 | - 0.0000 |
| K3P     | -24904.2001 | 51190.4002 | - 0.0000 | 62182.8600 | - 0.0000 | 54409.0858 | - 0.0000 |
| TIMe    | -24903.1542 | 51190.3084 | - 0.0000 | 62342.7735 | - 0.0000 | 54413.6521 | - 0.0000 |
| TIM2e   | -24909.4271 | 51202.8542 | - 0.0000 | 62355.3194 | - 0.0000 | 54426.1979 | - 0.0000 |
| K2P     | -24922.8810 | 51225.7620 | - 0.0000 | 62061.8984 | - 0.0000 | 54439.7896 | - 0.0000 |
| TNe     | -24921.7500 | 51225.5000 | - 0.0000 | 62217.9598 | - 0.0000 | 54444.1857 | - 0.0000 |
| F81+F+I | -25069.6446 | 51525.2892 | - 0.0000 | 62841.5716 | - 0.0000 | 54753.2909 | - 0.0000 |
| F81+F   | -25162.9605 | 51709.9210 | - 0.0000 | 62862.3861 | - 0.0000 | 54933.2646 | - 0.0000 |
| JC+I    | -25217.5610 | 51815.1220 | - 0.0000 | 62651.2583 | - 0.0000 | 55029.1496 | - 0.0000 |
| JC      | -25312.9951 | 52003.9903 | - 0.0000 | 62687.3611 | - 0.0000 | 55213.3599 | - 0.0000 |

AIC, w-AIC : Akaike information criterion scores and weights.

AICc, w-AICc : Corrected AIC scores and weights.

BIC, w-BIC : Bayesian information criterion scores and weights.

Plus signs denote the 95% confidence sets.

Minus signs denote significant exclusion.

## SUBSTITUTION PROCESS

-----

Model of substitution: TVM+F+I+G4

Rate parameter R:

A-C: 0.8730

A-G: 2.7783

A-T: 1.4067

C-G: 0.9892

C-T: 2.7783

G-T: 1.0000

State frequencies: (empirical counts from alignment)

pi(A) = 0.2826  
pi(C) = 0.2297  
pi(G) = 0.2022  
pi(T) = 0.2856

Rate matrix Q:

|   |         |        |        |        |
|---|---------|--------|--------|--------|
| A | -0.9466 | 0.1631 | 0.4568 | 0.3267 |
| C | 0.2006  | -1.009 | 0.1626 | 0.6452 |
| G | 0.6385  | 0.1848 | -1.056 | 0.2322 |
| T | 0.3233  | 0.519  | 0.1644 | -1.007 |

Model of rate heterogeneity: Invar+Gamma with 4 categories  
Proportion of invariable sites: 0.01821  
Gamma shape alpha: 1.604

| Category | Relative_rate | Proportion |
|----------|---------------|------------|
| 0        | 0             | 0.01821    |
| 1        | 0.2454        | 0.2454     |
| 2        | 0.6162        | 0.2454     |
| 3        | 1.076         | 0.2454     |
| 4        | 2.137         | 0.2454     |

Relative rates are computed as MEAN of the portion of the Gamma distribution falling in the category.

#### MAXIMUM LIKELIHOOD TREE

-----

Log-likelihood of the tree: -23855.2556 (s.e. 873.4117)  
Unconstrained log-likelihood (without tree): -4878.1706  
Number of free parameters (#branches + #model parameters): 698  
Akaike information criterion (AIC) score: 49106.5113  
Corrected Akaike information criterion (AICc) score: 61304.0613  
Bayesian information criterion (BIC) score: 52357.8030

Total tree length (sum of branch lengths): 25.3625  
Sum of internal branch lengths: 12.4962 (49.2702% of tree length)

WARNING: 58 near-zero internal branches (<0.0013) should be treated with caution  
Such branches are denoted by '\*' in the figure below

NOTE: Tree is UNROOTED although outgroup taxon 'HanXRQChr11\_78963679\_78964101' is drawn at root

Numbers in parentheses are SH-aLRT support (%) / ultrafast bootstrap support (%)

```

+--HanXRQChr11_78963679_78964101
|
|   +--HanXRQChr01_34887426_34894282
|   +**| (0/92)
|   | | +**HanXRQChr12_24613340_24614343
|   | +**| (0/95)
|   |   +**HanXRQChr08_22937900_22939039
|   +--| (87.6/98)
|   | +--HanXRQChr13_45702842_45703840
| +**| (0/98)
| | +--HanXRQChr17_205330461_205331450
+--| (76.7/100)
| +--HanXRQChr03_26205754_26213308
|
|   +--HanXRQChr04_67540092_67541320
|   +--| (89.9/100)
|   | | +--HanXRQChr06_27984911_27988051
|   | | +--| (90.5/100)
|   | | | +--HanXRQChr04_12175865_12181403
|   | | | +**| (0/55)
|   | | | | +--HanXRQChr17_211327788_211333859
|   | | | | +--| (90.6/100)
|   | | | | | +**HanXRQChr05_59284493_59290538
|   | | | | | +--| (98.4/100)
|   | | | | |   +**HanXRQChr05_106376295_106382341
|   | | | | | +**| (0/93)
|   | | | | | | +--HanXRQChr09_48889131_48889670
|   | | | | | | +--| (83.6/99)
|   | | | | | | | +--HanXRQChr15_55516101_55518531
|   | | | | | | +--| (98.8/99)
|   | | | | | | | +--HanXRQChr03_57480187_57481416
|   | | | | | | | +**| (0/80)
|   | | | | | | | | +--HanXRQChr05_166779247_166780763
|   | | | | | | | | +--| (79.5/100)
|   | | | | | | | |   +--HanXRQChr12_94875864_94876484
|   | | | | | | | | +--| (80.6/99)
|   | | | | | | | | | +--HanXRQChr04_92418435_92419412
|   | | | | | | | | | +--| (100/100)
|   | | | | | | | | | | +**HanXRQChr06_53262309_53263292
|   | | | | | | | | | | +--| (75.5/100)
|   | | | | | | | | | |   +--HanXRQChr05_9034545_9035531
|   | | | | | | | | | | +--| (95.9/99)

```

[illegible]

[illegible]



[illegible]

|                                    |  |  |  |  |  |  |  |  |  |  |  |                 |
|------------------------------------|--|--|--|--|--|--|--|--|--|--|--|-----------------|
|                                    |  |  |  |  |  |  |  |  |  |  |  | +--  (81.1/78)  |
|                                    |  |  |  |  |  |  |  |  |  |  |  | +--             |
| HanXRQChr07_11945240_11945839      |  |  |  |  |  |  |  |  |  |  |  |                 |
|                                    |  |  |  |  |  |  |  |  |  |  |  | +--  (86.5/100) |
|                                    |  |  |  |  |  |  |  |  |  |  |  | +--             |
| HanXRQChr05_23977914_23979210      |  |  |  |  |  |  |  |  |  |  |  |                 |
|                                    |  |  |  |  |  |  |  |  |  |  |  | +--  (93.4/99)  |
|                                    |  |  |  |  |  |  |  |  |  |  |  | +--             |
| HanXRQChr03_50693386_50694309      |  |  |  |  |  |  |  |  |  |  |  |                 |
|                                    |  |  |  |  |  |  |  |  |  |  |  | +--  (84/98)    |
|                                    |  |  |  |  |  |  |  |  |  |  |  | +--             |
| HanXRQChr08_40474325_40480066      |  |  |  |  |  |  |  |  |  |  |  |                 |
|                                    |  |  |  |  |  |  |  |  |  |  |  | +--  (68.7/85)  |
|                                    |  |  |  |  |  |  |  |  |  |  |  | +--             |
| HanXRQChr02_24653810_24657437      |  |  |  |  |  |  |  |  |  |  |  |                 |
|                                    |  |  |  |  |  |  |  |  |  |  |  | +--  (87.4/100) |
|                                    |  |  |  |  |  |  |  |  |  |  |  | +--             |
| HanXRQChr14_68289895_68297518      |  |  |  |  |  |  |  |  |  |  |  |                 |
|                                    |  |  |  |  |  |  |  |  |  |  |  | +--  (87/100)   |
|                                    |  |  |  |  |  |  |  |  |  |  |  | +--             |
| HanXRQChr14_68273516_68281146      |  |  |  |  |  |  |  |  |  |  |  |                 |
|                                    |  |  |  |  |  |  |  |  |  |  |  | +--  (85.8/90)  |
|                                    |  |  |  |  |  |  |  |  |  |  |  |                 |
| +**HanXRQChr02_147295547_147297741 |  |  |  |  |  |  |  |  |  |  |  |                 |
|                                    |  |  |  |  |  |  |  |  |  |  |  | +--  (88.1/100) |
|                                    |  |  |  |  |  |  |  |  |  |  |  |                 |
| +**HanXRQChr09_142942803_142944567 |  |  |  |  |  |  |  |  |  |  |  |                 |
|                                    |  |  |  |  |  |  |  |  |  |  |  | +--  (74.4/100) |
|                                    |  |  |  |  |  |  |  |  |  |  |  | +--             |
| HanXRQChr13_96620660_96621156      |  |  |  |  |  |  |  |  |  |  |  |                 |
|                                    |  |  |  |  |  |  |  |  |  |  |  | +--  (89.6/100) |
|                                    |  |  |  |  |  |  |  |  |  |  |  | +--             |
| HanXRQChr04_132271481_132272204    |  |  |  |  |  |  |  |  |  |  |  |                 |
|                                    |  |  |  |  |  |  |  |  |  |  |  | +--  (72.9/100) |
|                                    |  |  |  |  |  |  |  |  |  |  |  | +--             |
| HanXRQChr14_153324342_153328229    |  |  |  |  |  |  |  |  |  |  |  |                 |
|                                    |  |  |  |  |  |  |  |  |  |  |  | +--  (74.5/100) |
|                                    |  |  |  |  |  |  |  |  |  |  |  | +--             |
| HanXRQChr10_85192350_85197513      |  |  |  |  |  |  |  |  |  |  |  |                 |
|                                    |  |  |  |  |  |  |  |  |  |  |  | +--  (96.3/91)  |
|                                    |  |  |  |  |  |  |  |  |  |  |  | +--             |
| HanXRQChr06_97006962_97010930      |  |  |  |  |  |  |  |  |  |  |  |                 |
|                                    |  |  |  |  |  |  |  |  |  |  |  | +--  (84.7/100) |

[illegible]

|                                    |  |  |  |  |  |  |  |  |  |  |  |  |  |  |   |   |   |   |            |
|------------------------------------|--|--|--|--|--|--|--|--|--|--|--|--|--|--|---|---|---|---|------------|
|                                    |  |  |  |  |  |  |  |  |  |  |  |  |  |  | + | + | + |   | (96.1/100) |
|                                    |  |  |  |  |  |  |  |  |  |  |  |  |  |  |   |   |   |   |            |
| +**HanXRQChr13_179805528_179808054 |  |  |  |  |  |  |  |  |  |  |  |  |  |  |   |   |   |   |            |
|                                    |  |  |  |  |  |  |  |  |  |  |  |  |  |  | + | + | + |   | (0/56)     |
|                                    |  |  |  |  |  |  |  |  |  |  |  |  |  |  |   |   |   | + | +          |
| HanXRQChr05_64422906_64424659      |  |  |  |  |  |  |  |  |  |  |  |  |  |  |   |   |   |   |            |
|                                    |  |  |  |  |  |  |  |  |  |  |  |  |  |  |   | + | + | + |            |
|                                    |  |  |  |  |  |  |  |  |  |  |  |  |  |  |   |   |   | + | +          |
| HanXRQChr13_7315803_7323380        |  |  |  |  |  |  |  |  |  |  |  |  |  |  |   |   |   |   |            |
|                                    |  |  |  |  |  |  |  |  |  |  |  |  |  |  | + | + | + |   | (81.3/61)  |
|                                    |  |  |  |  |  |  |  |  |  |  |  |  |  |  |   |   |   | + | +          |
| HanXRQChr15_23213675_23214340      |  |  |  |  |  |  |  |  |  |  |  |  |  |  |   |   |   |   |            |
|                                    |  |  |  |  |  |  |  |  |  |  |  |  |  |  | + | + | + |   | (0/46)     |
|                                    |  |  |  |  |  |  |  |  |  |  |  |  |  |  |   |   |   | + | +          |
| HanXRQChr11_127530325_127537865    |  |  |  |  |  |  |  |  |  |  |  |  |  |  |   |   |   |   |            |
|                                    |  |  |  |  |  |  |  |  |  |  |  |  |  |  |   | + | + | + |            |
|                                    |  |  |  |  |  |  |  |  |  |  |  |  |  |  |   |   |   | + | +          |
| HanXRQChr12_23644236_23645297      |  |  |  |  |  |  |  |  |  |  |  |  |  |  |   |   |   |   |            |
|                                    |  |  |  |  |  |  |  |  |  |  |  |  |  |  | + | + | + |   | (92.4/92)  |
|                                    |  |  |  |  |  |  |  |  |  |  |  |  |  |  |   |   |   | + | +          |
| HanXRQChr14_116526279_116533821    |  |  |  |  |  |  |  |  |  |  |  |  |  |  |   |   |   |   |            |
|                                    |  |  |  |  |  |  |  |  |  |  |  |  |  |  |   | + | + | + |            |
|                                    |  |  |  |  |  |  |  |  |  |  |  |  |  |  |   |   |   | + | +          |
| HanXRQChr17_205323932_205330231    |  |  |  |  |  |  |  |  |  |  |  |  |  |  |   |   |   |   |            |
|                                    |  |  |  |  |  |  |  |  |  |  |  |  |  |  | + | + | + |   | (93.6/90)  |
|                                    |  |  |  |  |  |  |  |  |  |  |  |  |  |  |   |   |   | + | +          |
| +**HanXRQChr17_3057459_3059571     |  |  |  |  |  |  |  |  |  |  |  |  |  |  |   |   |   |   |            |
|                                    |  |  |  |  |  |  |  |  |  |  |  |  |  |  | + | + | + |   | (0/88)     |
|                                    |  |  |  |  |  |  |  |  |  |  |  |  |  |  |   |   |   | + | +          |
| HanXRQChr13_169241697_169244853    |  |  |  |  |  |  |  |  |  |  |  |  |  |  |   |   |   |   |            |
|                                    |  |  |  |  |  |  |  |  |  |  |  |  |  |  |   | + | + | + |            |
|                                    |  |  |  |  |  |  |  |  |  |  |  |  |  |  |   |   |   | + | +          |
| HanXRQChr01_90452614_90460077      |  |  |  |  |  |  |  |  |  |  |  |  |  |  |   |   |   |   |            |
|                                    |  |  |  |  |  |  |  |  |  |  |  |  |  |  | + | + | + |   | (79.3/100) |
|                                    |  |  |  |  |  |  |  |  |  |  |  |  |  |  |   |   |   | + | +          |
| HanXRQChr13_45704069_45710378      |  |  |  |  |  |  |  |  |  |  |  |  |  |  |   |   |   |   |            |
|                                    |  |  |  |  |  |  |  |  |  |  |  |  |  |  | + | + | + |   | (71.6/100) |
|                                    |  |  |  |  |  |  |  |  |  |  |  |  |  |  |   |   |   | + | +          |
| +**HanXRQChr08_22931465_22937801   |  |  |  |  |  |  |  |  |  |  |  |  |  |  |   |   |   |   |            |
|                                    |  |  |  |  |  |  |  |  |  |  |  |  |  |  | + | + | + |   | (89.5/100) |
|                                    |  |  |  |  |  |  |  |  |  |  |  |  |  |  |   |   |   | + | +          |
| HanXRQChr13_196274607_196275703    |  |  |  |  |  |  |  |  |  |  |  |  |  |  |   |   |   |   |            |
|                                    |  |  |  |  |  |  |  |  |  |  |  |  |  |  | + | + | + |   | (90.5/94)  |

|                                 |                 |
|---------------------------------|-----------------|
|                                 | +--             |
| HanXRQChr13_48436772_48438877   |                 |
|                                 | +--  (85.6/89)  |
|                                 | +--             |
| HanXRQChr15_129312466_129317224 |                 |
|                                 | +**  (0/57)     |
|                                 | +--             |
| HanXRQChr02_147809574_147817424 |                 |
|                                 | +--  (82/89)    |
|                                 | +--             |
| HanXRQChr14_171031165_171032099 |                 |
|                                 | +--  (99.9/100) |
|                                 | +--             |
| HanXRQChr10_113962499_113970363 |                 |
|                                 | +**  (0/81)     |
|                                 | +--             |
| HanXRQChr11_23755532_23757425   |                 |
|                                 | +**  (0/67)     |
|                                 | +--             |
| HanXRQChr01_4643702_4650088     |                 |
|                                 | +--  (85.6/97)  |
|                                 | +--             |
| HanXRQChr08_88222000_88228288   |                 |
|                                 | +--  (22.8/91)  |
|                                 | +--             |
| HanXRQChr15_150283897_150291604 |                 |
|                                 | +--  (96.6/99)  |
|                                 | +--             |
| HanXRQChr03_46527653_46534444   |                 |
|                                 | +--  (66.4/100) |
|                                 | +--             |
| HanXRQChr06_51391635_51395795   |                 |
|                                 | +--  (94.8/100) |
|                                 | +--             |
| HanXRQChr07_44435735_44436200   |                 |
|                                 | +--  (37.5/70)  |
|                                 | +--             |
| HanXRQChr10_167884487_167885281 |                 |
|                                 | +--  (43.7/75)  |
|                                 | +--             |
| HanXRQChr16_149753884_149754258 |                 |
|                                 | +--  (21.8/78)  |
|                                 | +--             |
| HanXRQChr01_98528860_98530430   |                 |

[illegible]

|   |    |    |                                 |                                 |  |  |  |  |  |
|---|----|----|---------------------------------|---------------------------------|--|--|--|--|--|
|   |    |    |                                 |                                 |  |  |  |  |  |
|   | +  | -- |                                 | (86.9/100)                      |  |  |  |  |  |
|   |    |    |                                 |                                 |  |  |  |  |  |
|   |    | +  | --                              | HanXRQChr17_171676962_171677479 |  |  |  |  |  |
|   |    |    |                                 |                                 |  |  |  |  |  |
|   | +  | -- |                                 | (75.8/100)                      |  |  |  |  |  |
|   |    |    |                                 |                                 |  |  |  |  |  |
|   |    | +  | --                              | HanXRQChr04_11014761_11015279   |  |  |  |  |  |
|   |    |    |                                 |                                 |  |  |  |  |  |
|   | +  | -- |                                 | (75.4/100)                      |  |  |  |  |  |
|   |    |    |                                 |                                 |  |  |  |  |  |
|   | +  | -- | HanXRQChr04_11235868_11236386   |                                 |  |  |  |  |  |
|   |    |    |                                 |                                 |  |  |  |  |  |
|   | +  | -- |                                 | (98.6/100)                      |  |  |  |  |  |
|   |    |    |                                 |                                 |  |  |  |  |  |
|   | +  | -- | HanXRQChr10_36325499_36326037   |                                 |  |  |  |  |  |
|   |    |    |                                 |                                 |  |  |  |  |  |
| + | -- |    | (71.1/69)                       |                                 |  |  |  |  |  |
|   |    |    |                                 |                                 |  |  |  |  |  |
|   | +  | -- | HanXRQChr09_16583017_16583476   |                                 |  |  |  |  |  |
|   |    |    |                                 |                                 |  |  |  |  |  |
|   | +  | -- |                                 | (100/100)                       |  |  |  |  |  |
|   |    |    |                                 |                                 |  |  |  |  |  |
|   | +  | -- | HanXRQChr02_53194187_53194755   |                                 |  |  |  |  |  |
|   |    |    |                                 |                                 |  |  |  |  |  |
| + | -- |    | (85.2/52)                       |                                 |  |  |  |  |  |
|   |    |    |                                 |                                 |  |  |  |  |  |
|   | +  | -- | HanXRQChr15_58262815_58263268   |                                 |  |  |  |  |  |
|   |    |    |                                 |                                 |  |  |  |  |  |
| + | -- |    | (78.3/37)                       |                                 |  |  |  |  |  |
|   |    |    |                                 |                                 |  |  |  |  |  |
|   | +  | -- | HanXRQChr03_53881858_53882406   |                                 |  |  |  |  |  |
|   |    |    |                                 |                                 |  |  |  |  |  |
|   | +  | -- |                                 | (73.9/100)                      |  |  |  |  |  |
|   |    |    |                                 |                                 |  |  |  |  |  |
|   | +  | ** | HanXRQChr15_50520164_50520709   |                                 |  |  |  |  |  |
|   |    |    |                                 |                                 |  |  |  |  |  |
|   | +  | -- |                                 | (100/100)                       |  |  |  |  |  |
|   |    |    |                                 |                                 |  |  |  |  |  |
|   | +  | -- | HanXRQChr08_58106590_58107151   |                                 |  |  |  |  |  |
|   |    |    |                                 |                                 |  |  |  |  |  |
|   | +  | ** |                                 | (0/68)                          |  |  |  |  |  |
|   |    |    |                                 |                                 |  |  |  |  |  |
|   | +  | -- | HanXRQChr04_117734534_117735067 |                                 |  |  |  |  |  |

[illegible]



|                                    |  |  |  |  |  |  |  |
|------------------------------------|--|--|--|--|--|--|--|
|                                    |  |  |  |  |  |  |  |
| +--  (92.1/100)                    |  |  |  |  |  |  |  |
|                                    |  |  |  |  |  |  |  |
| +--HanXRQChr10_26225253_26225786   |  |  |  |  |  |  |  |
|                                    |  |  |  |  |  |  |  |
| +--  (96.6/100)                    |  |  |  |  |  |  |  |
|                                    |  |  |  |  |  |  |  |
| +--HanXRQChr09_6730323_6730857     |  |  |  |  |  |  |  |
|                                    |  |  |  |  |  |  |  |
| (80.1/98)                          |  |  |  |  |  |  |  |
|                                    |  |  |  |  |  |  |  |
| +--HanXRQChr04_145024358_145024790 |  |  |  |  |  |  |  |
|                                    |  |  |  |  |  |  |  |
| (91.3/96)                          |  |  |  |  |  |  |  |
|                                    |  |  |  |  |  |  |  |
| +--HanXRQChr12_103007227_103007661 |  |  |  |  |  |  |  |
|                                    |  |  |  |  |  |  |  |
| (74.7/47)                          |  |  |  |  |  |  |  |
|                                    |  |  |  |  |  |  |  |
| +--HanXRQChr08_56688339_56688696   |  |  |  |  |  |  |  |
|                                    |  |  |  |  |  |  |  |
| +--  (70.4/96)                     |  |  |  |  |  |  |  |
|                                    |  |  |  |  |  |  |  |
| **HanXRQChr03_150064680_150065184  |  |  |  |  |  |  |  |
|                                    |  |  |  |  |  |  |  |
| +**  (0/61)                        |  |  |  |  |  |  |  |
|                                    |  |  |  |  |  |  |  |
| +**HanXRQChr03_126121322_126121826 |  |  |  |  |  |  |  |
|                                    |  |  |  |  |  |  |  |
| +--  (96.2/100)                    |  |  |  |  |  |  |  |
|                                    |  |  |  |  |  |  |  |
| +--HanXRQChr10_78375584_78376088   |  |  |  |  |  |  |  |
|                                    |  |  |  |  |  |  |  |
| +--  (95.5/100)                    |  |  |  |  |  |  |  |
|                                    |  |  |  |  |  |  |  |
| +**HanXRQChr07_12736562_12737068   |  |  |  |  |  |  |  |
|                                    |  |  |  |  |  |  |  |
| +--  (99.4/100)                    |  |  |  |  |  |  |  |
|                                    |  |  |  |  |  |  |  |
| +--HanXRQChr05_164461706_164462192 |  |  |  |  |  |  |  |
|                                    |  |  |  |  |  |  |  |
| (71.7/55)                          |  |  |  |  |  |  |  |
|                                    |  |  |  |  |  |  |  |
| +**HanXRQChr13_134302109_134302509 |  |  |  |  |  |  |  |

[illegible]

[illegible]

|            |                                    |                |
|------------|------------------------------------|----------------|
|            |                                    | +--            |
| (80.9/84)  |                                    |                |
|            |                                    |                |
|            | +**HanXRQChr02_131243878_131244246 |                |
|            |                                    |                |
|            | +--  (99.9/100)                    |                |
|            |                                    |                |
|            | +--HanXRQChr10_168209872_168210240 |                |
|            |                                    | +--  (95.6/90) |
|            |                                    | +--            |
|            | HanXRQChr08_113839738_113840105    |                |
|            |                                    | +--            |
| (74.1/96)  |                                    |                |
|            |                                    | +--            |
|            | HanXRQChr04_28158629_28159233      |                |
|            |                                    | +--            |
| (100/100)  |                                    |                |
|            |                                    | +--            |
|            | HanXRQChr11_39830792_39831397      |                |
|            |                                    | +--  (84.9/64) |
|            |                                    |                |
|            | +**HanXRQChr11_133792609_133792984 |                |
|            |                                    | +--            |
| (98.3/100) |                                    |                |
|            |                                    |                |
|            | +**HanXRQChr11_133775764_133776143 |                |
|            |                                    | +--            |
| (87.5/100) |                                    |                |
|            |                                    | +--            |
|            | HanXRQChr05_62558786_62559318      |                |
|            |                                    | +--            |
| (95.1/100) |                                    |                |
|            |                                    | +--            |
|            | HanXRQChr09_124910897_124911250    |                |
|            |                                    | +--            |
| (100/100)  |                                    |                |
|            |                                    | +--            |
|            | HanXRQChr11_30817527_30817892      |                |
|            |                                    | +--  (87.4/80) |
|            |                                    | +--            |
|            | HanXRQChr17_68193643_68194142      |                |
|            |                                    | +--            |
| (100/100)  |                                    |                |

[illegible]

[illegible]

[illegible]

[illegible]



[illegible]

[illegible]

|                                 |  |  |  |  |  |  |  |
|---------------------------------|--|--|--|--|--|--|--|
|                                 |  |  |  |  |  |  |  |
| HanXRQChr16_150636591_150640613 |  |  |  |  |  |  |  |
|                                 |  |  |  |  |  |  |  |
| HanXRQChr17_47637609_47642782   |  |  |  |  |  |  |  |
|                                 |  |  |  |  |  |  |  |
| HanXRQChr09_42030904_42038738   |  |  |  |  |  |  |  |
|                                 |  |  |  |  |  |  |  |
| HanXRQChr08_88220498_88221890   |  |  |  |  |  |  |  |
|                                 |  |  |  |  |  |  |  |
| HanXRQChr15_74394306_74402182   |  |  |  |  |  |  |  |
|                                 |  |  |  |  |  |  |  |
| HanXRQChr05_177102059_177102727 |  |  |  |  |  |  |  |
|                                 |  |  |  |  |  |  |  |
| HanXRQChr05_199634091_199642069 |  |  |  |  |  |  |  |
|                                 |  |  |  |  |  |  |  |
|                                 |  |  |  |  |  |  |  |
|                                 |  |  |  |  |  |  |  |
|                                 |  |  |  |  |  |  |  |
|                                 |  |  |  |  |  |  |  |
|                                 |  |  |  |  |  |  |  |
|                                 |  |  |  |  |  |  |  |
|                                 |  |  |  |  |  |  |  |
| HanXRQChr04_4585394_4586317     |  |  |  |  |  |  |  |
|                                 |  |  |  |  |  |  |  |
|                                 |  |  |  |  |  |  |  |
|                                 |  |  |  |  |  |  |  |
|                                 |  |  |  |  |  |  |  |
|                                 |  |  |  |  |  |  |  |
|                                 |  |  |  |  |  |  |  |
|                                 |  |  |  |  |  |  |  |
| HanXRQChr10_201208107_201211833 |  |  |  |  |  |  |  |
|                                 |  |  |  |  |  |  |  |

|                 |                                    |                                    |                                    |
|-----------------|------------------------------------|------------------------------------|------------------------------------|
| +--             |                                    |                                    |                                    |
| +--  (93.4/100) |                                    |                                    |                                    |
|                 |                                    | +--                                |                                    |
| +**  (0/92)     |                                    |                                    |                                    |
|                 |                                    | +--                                |                                    |
| +--  (86.6/100) |                                    |                                    |                                    |
|                 |                                    | +--                                |                                    |
| +--  (89.6/100) |                                    |                                    |                                    |
|                 | +--                                |                                    |                                    |
| +--  (93.6/98)  |                                    |                                    |                                    |
|                 | +--                                |                                    |                                    |
| +--  (74/98)    |                                    |                                    |                                    |
|                 | +--                                |                                    |                                    |
| +--  (95.2/99)  |                                    |                                    |                                    |
|                 | +--HanXRQChr09_26818251_26820777   |                                    |                                    |
| +--  (4.2/70)   |                                    |                                    |                                    |
|                 | +--HanXRQChr03_34702985_34703845   |                                    |                                    |
| +--  (85.3/97)  |                                    |                                    |                                    |
|                 |                                    | +--HanXRQChr17_164543226_164545213 |                                    |
|                 |                                    | +**  (0/93)                        |                                    |
|                 |                                    |                                    | +**HanXRQChr11_5059413_5062302     |
|                 |                                    |                                    | +--  (96.6/100)                    |
|                 |                                    |                                    | +**HanXRQChr16_159464039_159466946 |
|                 | +--  (96.9/100)                    |                                    |                                    |
|                 |                                    | +--                                |                                    |
| +--  (72/100)   |                                    |                                    |                                    |
|                 |                                    | +**HanXRQChr12_8060455_8064354     |                                    |
|                 | +--  (100/100)                     |                                    |                                    |
|                 | +--HanXRQChr04_4414273_4418183     |                                    |                                    |
| +--  (85.8/100) |                                    |                                    |                                    |
|                 | +--HanXRQChr16_154231921_154234094 |                                    |                                    |
|                 | +--  (87.4/100)                    |                                    |                                    |
|                 |                                    | +--                                |                                    |
|                 |                                    | +--  (57.7/100)                    |                                    |

[illegible]

|  |  |  |  |  |                                    |                                  |
|--|--|--|--|--|------------------------------------|----------------------------------|
|  |  |  |  |  |                                    | +--HanXRQChr12_74630615_74638291 |
|  |  |  |  |  |                                    | +--  (97.9/100)                  |
|  |  |  |  |  | +--HanXRQChr05_32799874_32806012   |                                  |
|  |  |  |  |  | +--  (78.8/100)                    |                                  |
|  |  |  |  |  | +--HanXRQChr05_66536036_66536958   |                                  |
|  |  |  |  |  | +--  (71.6/99)                     |                                  |
|  |  |  |  |  | +--HanXRQChr09_42108185_42108601   |                                  |
|  |  |  |  |  | +--  (74/100)                      |                                  |
|  |  |  |  |  | +--HanXRQChr14_70675600_70678361   |                                  |
|  |  |  |  |  | +**  (0/99)                        |                                  |
|  |  |  |  |  | +--HanXRQChr14_79208902_79211665   |                                  |
|  |  |  |  |  | +**  (0/91)                        |                                  |
|  |  |  |  |  | +--HanXRQChr14_77501682_77504443   |                                  |
|  |  |  |  |  | +--  (73.9/100)                    |                                  |
|  |  |  |  |  | +--HanXRQChr02_175774663_175777915 |                                  |
|  |  |  |  |  | +--  (99.1/100)                    |                                  |
|  |  |  |  |  | +--HanXRQChr08_40489307_40491198   |                                  |
|  |  |  |  |  | +--  (69.5/81)                     |                                  |
|  |  |  |  |  | +--HanXRQChr09_184856661_184857251 |                                  |
|  |  |  |  |  | +--  (99.8/100)                    |                                  |
|  |  |  |  |  | +--HanXRQChr13_144823475_144824100 |                                  |
|  |  |  |  |  | +--  (75.4/57)                     |                                  |
|  |  |  |  |  | +--HanXRQChr15_104285615_104286058 |                                  |
|  |  |  |  |  | +--  (94.7/100)                    |                                  |
|  |  |  |  |  | +--HanXRQChr05_209135841_209137273 |                                  |
|  |  |  |  |  | +--  (27.1/63)                     |                                  |
|  |  |  |  |  | +--HanXRQChr16_128055830_128059471 |                                  |
|  |  |  |  |  | +--  (40.9/98)                     |                                  |
|  |  |  |  |  | +--HanXRQChr11_34832223_34833041   |                                  |
|  |  |  |  |  | +--  (82.6/100)                    |                                  |
|  |  |  |  |  | +--HanXRQChr03_69429483_69433013   |                                  |
|  |  |  |  |  | +--  (97.2/100)                    |                                  |
|  |  |  |  |  | +--HanXRQChr04_162448231_162451209 |                                  |
|  |  |  |  |  | +--  (95.9/100)                    |                                  |
|  |  |  |  |  | +--HanXRQChr13_159695079_159696066 |                                  |
|  |  |  |  |  | +--  (89.8/100)                    |                                  |
|  |  |  |  |  | +--HanXRQChr06_34593592_34601130   |                                  |
|  |  |  |  |  | +--  (79.2/98)                     |                                  |
|  |  |  |  |  | +**HanXRQChr07_27634064_27638140   |                                  |
|  |  |  |  |  | +**  (0/99)                        |                                  |
|  |  |  |  |  | +--HanXRQChr05_64416693_64422326   |                                  |
|  |  |  |  |  | +--  (18.2/85)                     |                                  |
|  |  |  |  |  | +--HanXRQChr15_23210956_23213675   |                                  |
|  |  |  |  |  | +--  (90.5/99)                     |                                  |

```

|   |   +--HanXRQChr11_69846093_69853687
|   +--| (91.6/98)
|   |   +**HanXRQChr06_20451348_20451704
|   |   +**| (0/97)
|   |   +--HanXRQChr13_179591469_179595652
|   +**| (0/80)
|   |   +**HanXRQChr12_45905678_45909951
|   |   +--| (89.6/100)
|   |   |   +**HanXRQChr15_74224040_74228313
|   |   +**| (0/67)
|   |   |   +--HanXRQChr13_2986278_2987762
|   |   +**| (0/67)
|   |   +**HanXRQChr02_4724981_4726023
|   +--| (89.8/100)
|   +--HanXRQChr13_135223336_135224153
+--| (96.4/100)
    +--HanXRQChr13_196286900_196290049

```

Tree in newick format:

```

(HanXRQChr11_78963679_78964101:0.0407776336,((((HanXRQChr01_34887426_34894282:
0.0043297442,(HanXRQChr12_24613340_24614343:0.0000022540,HanXRQChr08_22937900
_22939039:0.0000022540)0/95:0.0000022540)0/92:0.0000021621,HanXRQChr13_45702842_
45703840:0.0086767326)87.6/98:0.0043269821,HanXRQChr17_205330461_205331450:0.004
7454988)0/98:0.0000029605,HanXRQChr03_26205754_26213308:0.0130899865)76.7/100:0.0
048715417,(((HanXRQChr04_67540092_67541320:0.0216295207,((HanXRQChr06_27984911
_27988051:0.0130756142,(HanXRQChr04_12175865_12181403:0.0223904963,(((HanXRQC
hr17_211327788_211333859:0.0131105633,(HanXRQChr05_59284493_59290538:0.0000022
540,HanXRQChr05_106376295_106382341:0.0000022540)98.4/100:0.0270642086)90.6/100:0
.0149190887,((HanXRQChr09_48889131_48889670:0.0526367015,HanXRQChr15_55516101
_55518531:0.0431452481)83.6/99:0.0253881334,((((HanXRQChr03_57480187_57481416:0.
0473632306,(HanXRQChr05_166779247_166780763:0.0869229259,HanXRQChr12_9487586
4_94876484:0.1080360370)79.5/100:0.0113857758)0/80:0.0000029488,(HanXRQChr04_9241
8435_92419412:0.0044649344,(HanXRQChr06_53262309_53263292:0.0000028097,HanXRQ
Chr05_9034545_9035531:0.0087871563)75.5/100:0.0042873327)100/100:0.1911173534)80.6/
99:0.0119082793,HanXRQChr11_113608046_113608769:0.0919898626)95.9/99:0.043746738
0,((((HanXRQChr16_94477431_94477942:0.1508149849,((((HanXRQChr17_67579875_67582
613:0.0706645722,HanXRQChr11_142203384_142204256:0.1226652255)99.9/100:0.0972337
935,HanXRQChr04_176555457_176557628:0.0487691419)0/88:0.0000029528,HanXRQChr01
_116026086_116027124:0.0273901164)73.8/96:0.0044776186,HanXRQChr13_137859189_13
7859594:0.0260378128)99.9/100:0.1111983753)70.6/96:0.0095799038,HanXRQChr10_15262
4866_152626709:0.0607217246)79/97:0.0222102701,(((HanXRQChr07_57474618_57475394:
0.0178564920,HanXRQChr07_57434299_57438258:0.0265375732)82.2/100:0.0085698662,(H
anXRQChr05_190757444_190758598:0.0133619993,(HanXRQChr13_94278579_94280493:0.

```

0207500899,HanXRQChr04\_115355662\_115358538:0.0307573865)99.8/100:0.0688222028)4  
3/100:0.0045823146)93/100:0.0236667681,(((HanXRQChr11\_18867372\_18868580:0.0000022  
540,HanXRQChr02\_20281946\_20283260:0.0000022540)0/73:0.0000029696,HanXRQChr11\_1  
8749900\_18751215:0.0043236120)98.5/100:0.0368296905,HanXRQChr06\_28223014\_282278  
54:0.0255174809)79.9/98:0.0136583694)94.4/98:0.0440523126)100/100:0.1941979426,((HanX  
RQChr12\_88474680\_88475105:0.2936417582,(((HanXRQChr01\_1207903\_1208488:0.02605  
19686,(HanXRQChr08\_151986814\_151987353:0.0276449800,HanXRQChr10\_94811711\_948  
12246:0.0585106205)97.9/100:0.0420011379)78/99:0.0182334635,(HanXRQChr05\_16886133  
0\_168861873:0.0564628918,(HanXRQChr05\_193946694\_193947239:0.0212606032,HanXRQ  
Chr05\_193733456\_193734002:0.0142023858)89.2/100:0.0272554672)98.5/100:0.0662155976  
)87.6/99:0.0460086577,HanXRQChr05\_182283860\_182284319:0.0974523078)90/99:0.076573  
6202,(HanXRQChr17\_105500849\_105501312:0.0618007745,((HanXRQChr04\_16618909\_166  
19279:0.0384123611,(HanXRQChr01\_146764857\_146765256:0.0086020586,(HanXRQChr03\_  
20364521\_20364920:0.0000022540,(HanXRQChr05\_14305976\_14306375:0.0000022540,Han  
XRQChr16\_185568115\_185568603:0.0000025739)0/38:0.0000025738)0/76:0.0000020848)10  
0/100:0.4708722576)62/60:0.0300378244,HanXRQChr03\_113315527\_113315992:0.09814465  
48)84.8/62:0.0257007063)90.4/98:0.0826607494)100/100:0.4714316589)88.6/99:0.159624595  
4,((((HanXRQChr02\_175754451\_175758707:0.0523647971,HanXRQChr13\_94161763\_94165  
162:0.0310485253)95.9/93:0.0477776294,(HanXRQChr11\_38886892\_38889248:0.057261343  
1,(HanXRQChr05\_164509744\_164514326:0.0781800243,HanXRQChr03\_34772558\_3477346  
8:0.1553594795)40/82:0.0309149599)93.2/93:0.0473447941)77.6/68:0.0296197486,((((HanXR  
QChr08\_33398524\_33406006:0.0271464847,HanXRQChr12\_40586043\_40589256:0.0261652  
586)95.1/100:0.0258350797,(HanXRQChr13\_77076783\_77077636:0.0533975075,((((HanXRQ  
Chr10\_115966867\_115967362:0.0275735570,HanXRQChr17\_164520103\_164521773:0.03284  
96378)0/14:0.0000022540,(HanXRQChr01\_49628126\_49635945:0.0091247445,HanXRQChr1  
4\_68245992\_68247226:0.0371039293)0/34:0.0000027375)0/19:0.0000029466,(HanXRQChr09  
\_125961449\_125964480:0.0326371860,((HanXRQChr06\_28014629\_28015962:0.0327449809,  
HanXRQChr11\_23461540\_23465141:0.0136010567)72.3/100:0.0046539154,HanXRQChr04\_1  
66379772\_166382442:0.0564309889)77.7/76:0.0042338752)76.4/70:0.0046063042)78.4/76:0.  
0057556384,((HanXRQChr04\_174582120\_174583103:0.0492630832,HanXRQChr13\_1352245  
56\_135226019:0.1029639510)87.6/99:0.0229581538,(HanXRQChr07\_11945240\_11945839:0.  
0474059547,HanXRQChr05\_23977914\_23979210:0.0671674222)86.5/100:0.0177450769)81.1  
/78:0.0105119247)80.2/99:0.0119280150)98.4/100:0.0410582421)38.4/85:0.0045427296,HanX  
RQChr03\_50693386\_50694309:0.0149071054)93.4/99:0.0341485821,HanXRQChr08\_404743  
25\_40480066:0.0770203114)84/98:0.0254422125)98.5/91:0.0865369392,(((((((HanXRQChr02  
\_24653810\_24657437:0.0045017656,(HanXRQChr14\_68289895\_68297518:0.0090718466,Ha  
nXRQChr14\_68273516\_68281146:0.0137250959)87/100:0.0091655354)87.4/100:0.009312117  
6,(((((((HanXRQChr02\_147295547\_147297741:0.0000022540,HanXRQChr09\_142942803\_142  
944567:0.0000022540)88.1/100:0.0091947846,HanXRQChr13\_96620660\_96621156:0.013653  
6302)74.4/100:0.0044642353,HanXRQChr04\_132271481\_132272204:0.0183363079)89.6/100:  
0.0132539545,HanXRQChr14\_153324342\_153328229:0.0223570017)72.9/100:0.0061538858,  
HanXRQChr10\_85192350\_85197513:0.0178563787)74.5/100:0.0088050290,((HanXRQChr06\_  
97006962\_97010930:0.0135931833,HanXRQChr03\_159793635\_159795071:0.0091836909)84  
.7/100:0.0092125465,(((HanXRQChr07\_88885423\_88893193:0.0090759984,HanXRQChr08\_3

9439464\_39440150:0.0000022540)0/34:0.0000027732,HanXRQChr08\_109696851\_10969759  
3:0.0045221872)98.8/100:0.0276009398,(HanXRQChr01\_140346486\_140347133:0.02347490  
75,HanXRQChr16\_117883570\_117885696:0.0087711249)75.9/99:0.0046483713)84.5/95:0.00  
91211601)100/100:0.0716579927)96.3/91:0.0234651610)85.8/90:0.0092517031,HanXRQChr1  
0\_225800164\_225801136:0.0133397565)96.4/90:0.0302428199,((HanXRQChr04\_79257170\_7  
9260978:0.0320161806,(HanXRQChr09\_141496442\_141499885:0.0140330328,HanXRQChr0  
3\_70542853\_70547885:0.0232302253)0/85:0.0000026830)97.2/100:0.0312372069,HanXRQC  
hr07\_94262118\_94263107:0.0519417234)75/88:0.0065991367)86.1/82:0.0143966349,(((Han  
XRQChr17\_170737481\_170744938:0.0113430342,HanXRQChr04\_115339901\_115344808:0.0  
148024803)28.7/88:0.0054042316,HanXRQChr05\_177667685\_177675472:0.0505881327)82.6  
/100:0.0103000685,(((((((HanXRQChr13\_179578065\_179585597:0.0000022540,HanXRQChr1  
3\_179805528\_179808054:0.0000022540)96.1/100:0.0137476474,(HanXRQChr05\_64422906\_  
64424659:0.0045595707,HanXRQChr13\_7315803\_7323380:0.0135828196)77.5/99:0.0044297  
585)0/56:0.0000022565,HanXRQChr15\_23213675\_23214340:0.0228608442)81.3/61:0.004418  
1289,(HanXRQChr11\_127530325\_127537865:0.0090490660,HanXRQChr12\_23644236\_2364  
5297:0.0137063518)0/67:0.0000027602)0/46:0.0000021827,(HanXRQChr14\_116526279\_1165  
33821:0.0045679750,HanXRQChr17\_205323932\_205330231:0.0138613284)22.1/75:0.004479  
8250)92.4/92:0.0225853693,(HanXRQChr17\_3057459\_3059571:0.0000021337,((HanXRQChr  
13\_169241697\_169244853:0.0090258968,HanXRQChr01\_90452614\_90460077:0.013672630  
9)0/68:0.0000020035,(HanXRQChr13\_45704069\_45710378:0.0043090049,HanXRQChr08\_22  
931465\_22937801:0.0006403172)71.6/100:0.0040171480)79.3/100:0.0044479235)0/88:0.0000  
021489)93.6/90:0.0271147419,HanXRQChr13\_196274607\_196275703:0.0528707548)89.5/10  
0:0.0174325304,((HanXRQChr13\_48436772\_48438877:0.0090266680,(((HanXRQChr15\_1293  
12466\_129317224:0.0044881732,HanXRQChr02\_147809574\_147817424:0.0044754188)0/57:  
0.0000028697,(HanXRQChr14\_171031165\_171032099:0.0041730131,HanXRQChr10\_113962  
499\_113970363:0.0149683844)99.9/100:0.0772497137)82/89:0.0044783531,(HanXRQChr11\_  
23755532\_23757425:0.0090277958,HanXRQChr01\_4643702\_4650088:0.0044793681)0/67:0.  
0000026492)0/81:0.0000021179)85.6/89:0.0089358579,HanXRQChr08\_88222000\_88228288:  
0.0227821493)85.6/97:0.0100345678)90.5/94:0.0193777807)96.1/100:0.0373605244,HanXRQ  
Chr15\_150283897\_150291604:0.0378225084)22.8/91:0.0192862668)93.3/99:0.0328039340,((  
HanXRQChr03\_46527653\_46534444:0.0383866676,HanXRQChr06\_51391635\_51395795:0.0  
240643240)66.4/100:0.0028043650,HanXRQChr07\_44435735\_44436200:0.0286740369)94.8/  
100:0.0316833580)96.6/99:0.0446324539,HanXRQChr10\_167884487\_167885281:0.06633253  
82)37.5/70:0.0240914028,(((HanXRQChr16\_149753884\_149754258:0.0817025581,HanXRQC  
hr01\_98528860\_98530430:0.0545971110)21.8/78:0.0131965369,HanXRQChr16\_128066409\_  
128067498:0.0582553305)79.7/69:0.0161667829,((HanXRQChr02\_20242486\_20243525:0.030  
3194821,HanXRQChr11\_18762949\_18764264:0.0158245202)83.2/100:0.0180498032,HanXR  
QChr16\_148694596\_148701069:0.0718640380)86.2/100:0.0215411710)90.5/72:0.0341805061  
)43.7/75:0.0498962569)68.7/85:0.0228914840,(((HanXRQChr15\_23293519\_23294345:0.1233  
060736,(HanXRQChr06\_29856663\_29857319:0.1934857608,HanXRQChr17\_60426850\_6042  
8287:0.8448826242)99.2/100:0.3508927069)24.5/79:0.0341572532,((((((((((((((((HanXRQChr  
07\_30137334\_30143115:0.0089336804,HanXRQChr15\_6435740\_6441546:0.0000027405)0/8  
7:0.0000028417,HanXRQChr05\_211734084\_211734739:0.0044645276)99/100:0.0360458257,  
HanXRQChr04\_4816946\_4817774:0.0509362853)0/67:0.0000021855,HanXRQChr09\_906132



12\_90613775:0.0473501345)99.8/100:0.0709927876,((HanXRQChr14\_164972043\_164972420  
:0.0176081468,(HanXRQChr17\_171676962\_171677479:0.0090450629,(HanXRQChr04\_11014  
761\_11015279:0.0135846119,HanXRQChr04\_11235868\_11236386:0.0135869997)75.4/100:0.  
0044199875)75.8/100:0.0049145362)86.9/100:0.0134131108,HanXRQChr10\_36325499\_3632  
6037:0.0142825010)98.6/100:0.0492780091)78.4/97:0.0112058180,(HanXRQChr09\_16583017  
\_16583476:0.0103701224,HanXRQChr02\_53194187\_53194755:0.0174863589)100/100:0.100  
2315154)71.1/69:0.0051124004,HanXRQChr15\_58262815\_58263268:0.1301898811)85.2/52:0  
.0185846920,((((HanXRQChr03\_53881858\_53882406:0.0089745142,HanXRQChr15\_505201  
64\_50520709:0.0000022540)73.9/100:0.0042153214,HanXRQChr08\_58106590\_58107151:0.0  
138608747)100/100:0.0674867821,HanXRQChr04\_117734534\_117735067:0.0811966467)0/6  
8:0.0000028289,HanXRQChr07\_39909716\_39910258:0.1080716237)88/58:0.0142740168,Han  
XRQChr11\_114599910\_114600468:0.0994928958)67.1/53:0.0029856485,((HanXRQChr08\_10  
2456485\_102456998:0.0814209307,(HanXRQChr03\_6367591\_6368162:0.1361766466,(HanX  
RQChr08\_32332017\_32332576:0.0000022540,HanXRQChr05\_142623602\_142624161:0.0000  
021945)99.7/100:0.0890270409)57.2/95:0.0309329017)87.2/95:0.0229367787,(((HanXRQChr1  
0\_160816414\_160816781:0.0132283323,HanXRQChr09\_205724496\_205724897:0.02815782  
08)96.5/99:0.0400857522,HanXRQChr05\_5609714\_5610098:0.2036870927)0/57:0.000002905  
3,HanXRQChr16\_19443969\_19444339:0.1008989341)100/100:0.1959244221)76.8/60:0.00720  
72125)0/34:0.0000024330)78.3/37:0.0066563544,((((HanXRQChr01\_65087231\_65087766:0.0  
135556208,HanXRQChr10\_26225253\_26225786:0.0089797325)92.1/100:0.0281842623,HanX  
RQChr09\_6730323\_6730857:0.0343125126)96.6/100:0.0486344545,HanXRQChr04\_1450243  
58\_145024790:0.0773043241)80.1/98:0.0251962880,HanXRQChr12\_103007227\_103007661:  
0.1261615623)91.3/96:0.0325230912)64/35:0.0031014688,((((HanXRQChr08\_56688339\_566  
88696:0.0182035568,((HanXRQChr03\_150064680\_150065184:0.0000022540,HanXRQChr03\_  
126121322\_126121826:0.0000022540)0/61:0.0000022540,HanXRQChr10\_78375584\_783760  
88:0.0044945125)96.2/100:0.0189917507)70.4/96:0.0046338344,HanXRQChr07\_12736562\_1  
2737068:0.0000020665)95.5/100:0.0395982852,HanXRQChr05\_164461706\_164462192:0.053  
4316573)99.4/100:0.0701332590,(((HanXRQChr13\_134302109\_134302509:0.0000020743,(Ha  
nXRQChr10\_95181243\_95181772:0.0000022540,HanXRQChr17\_160614824\_160615353:0.00  
00022540)94.5/100:0.0133594256)98.9/100:0.0264768722,(((HanXRQChr17\_13361200\_1336  
1728:0.0179155134,((HanXRQChr12\_75917343\_75917873:0.0044251049,HanXRQChr14\_863  
41928\_86342457:0.0000022540)92.3/100:0.0136426192,HanXRQChr03\_99988684\_99989213  
:0.0320501782)74/100:0.0042732247)77.2/100:0.0044927472,HanXRQChr17\_99228227\_9922  
8757:0.0179781112)84.2/100:0.0080946430,(HanXRQChr16\_15638745\_15639274:0.0088837  
181,HanXRQChr05\_144936503\_144937032:0.0000021245)79.6/100:0.0052420398)53.3/92:0.  
0044334374)0/51:0.0000024659,HanXRQChr02\_114840517\_114841046:0.0280183585)99.9/1  
00:0.0920744856)71.7/55:0.0097374279,(((HanXRQChr11\_55711325\_55711859:0.103616383  
0,(HanXRQChr01\_29157382\_29157877:0.1270085974,HanXRQChr13\_104941607\_10494213  
7:0.1327716266)78.8/98:0.0273764349)82.6/73:0.0197088495,(HanXRQChr08\_25571094\_255  
71648:0.0165815174,HanXRQChr05\_44360152\_44360708:0.0413347122)100/100:0.1095562  
818)82.4/66:0.0132827505,HanXRQChr10\_187118315\_187118736:0.1578863758)70.3/53:0.0  
068290451)90.2/56:0.0230633935)74.7/47:0.0049984920,((HanXRQChr09\_8264746\_8265314:  
0.0267794239,HanXRQChr16\_71647538\_71648109:0.0155600373)98.2/100:0.0446129554,(H  
anXRQChr13\_88688183\_88688669:0.0918438905,HanXRQChr17\_31920748\_31921235:0.021

4122568)100/100:0.1324592474)84.3/77:0.0136990889)0/42:0.0000027053,((HanXRQChr17\_84099735\_84100241:0.0654948828,HanXRQChr10\_11267406\_11267923:0.1010578275)88.5/99:0.0210928228,(HanXRQChr02\_131243878\_131244246:0.0000022540,HanXRQChr10\_168209872\_168210240:0.0044479397)99.9/100:0.0793585929)80.9/84:0.0191125572)93.2/57:0.0533691298,((HanXRQChr08\_113839738\_113840105:0.0182427317,HanXRQChr04\_28158629\_28159233:0.0044903456)74.1/96:0.0043775034,HanXRQChr11\_39830792\_39831397:0.0046755489)100/100:0.1574923007)95.6/90:0.0593800758,(((HanXRQChr11\_133792609\_133792984:0.0000022540,HanXRQChr11\_133775764\_133776143:0.0000022540)98.3/100:0.0356648359,HanXRQChr05\_62558786\_62559318:0.0255374042)87.5/100:0.0222610765,(HanXRQChr09\_124910897\_124911250:0.0049736748,HanXRQChr11\_30817527\_30817892:0.0174895587)100/100:0.1459963250)95.1/100:0.0404609093)84.9/64:0.0230554019,(HanXRQChr17\_68193643\_68194142:0.0273517059,HanXRQChr11\_94539491\_94539990:0.0136734102)100/100:0.1192951574)87.4/80:0.0246235482,((((HanXRQChr01\_40849696\_40850225:0.0328901078,HanXRQChr11\_135844467\_135845030:0.0130556169)0/90:0.0000028799,(HanXRQChr16\_45835607\_45836135:0.0173346340,HanXRQChr04\_141436125\_141436654:0.0188610248)85/100:0.0176880864)99.6/100:0.0873137175,HanXRQChr14\_73178118\_73178607:0.1881823720)77.2/79:0.0184236781,(HanXRQChr09\_74883466\_74883949:0.0209344902,HanXRQChr05\_179907532\_179908035:0.0343140605)99.9/100:0.1144674901)48.8/41:0.0115417829,(HanXRQChr10\_170724767\_170725228:0.0753475970,(HanXRQChr11\_114441513\_114442047:0.0459185046,HanXRQChr08\_22016304\_22016849:0.0675736977)84.7/98:0.0195319250)93/95:0.0212514096)0/25:0.0000025501)86.6/39:0.0116832699,((((((((HanXRQChr17\_93185904\_93186267:0.0044955139,HanXRQChr17\_93126497\_93127118:0.0090201873)0/56:0.0000023699,HanXRQChr17\_93164704\_93165330:0.0183070709)98/100:0.0225810461,(((HanXRQChr04\_162198911\_162199522:0.0044845072,HanXRQChr17\_31095021\_31095488:0.0092138861)97/100:0.0182335286,(HanXRQChr16\_139484437\_139485058:0.0135560757,((HanXRQChr06\_73271993\_73272461:0.0136972952,(HanXRQChr17\_13434430\_13434837:0.0183658005,(HanXRQChr05\_171432714\_171433335:0.0089761683,HanXRQChr02\_40423347\_40423968:0.0136707982)0/87:0.0000022540)96.2/100:0.0137083062)0/76:0.0000024478,HanXRQChr10\_144765081\_144765648:0.0912559488)0/93:0.0000024494)0/60:0.0000026627)84.9/89:0.0048498605,((((HanXRQChr13\_193729788\_193730410:0.0045179667,HanXRQChr02\_111025526\_111026149:0.0044795217)84.7/100:0.0089848261,HanXRQChr01\_83910798\_83911405:0.0321694581)0/93:0.0000024451,(HanXRQChr14\_28912143\_28912767:0.0376907500,HanXRQChr11\_61241453\_61242074:0.0468962180)0/48:0.0000021342)85.2/84:0.0045431354,(HanXRQChr15\_64901712\_64902075:0.0000022540,HanXRQChr04\_57314850\_57315475:0.0000022540)97.2/100:0.0181150499)0/41:0.0000028272,HanXRQChr02\_40199887\_40200279:0.0229420249)83.2/82:0.0045433763)0/51:0.0000020205)0/22:0.0000020688,HanXRQChr17\_139322691\_139323166:0.0417252983)0/29:0.0000028171,(((HanXRQChr10\_145087013\_145087418:0.0184761020,HanXRQChr10\_175382210\_175382618:0.0137710671)88.3/100:0.0138609441,HanXRQChr06\_56355680\_56356069:0.0474505201)82.8/100:0.0113213652,(HanXRQChr17\_95938863\_95939232:0.0260756578,HanXRQChr13\_144225259\_144225863:0.0158742304)98.5/99:0.0467341455)77.4/93:0.0068584296)24.4/32:0.0054899213,HanXRQChr07\_94174100\_94174724:0.0171908304)100/100:0.1522564401,((((HanXRQChr15\_52286990\_52287513:0.1073539684,(HanXRQChr09\_19029933\_19030470:0.0000026729,HanXRQChr09\_126494259\_126494796:0.0045140210)85.9/100:0.0096459080)68.5/100:0.0033236860,HanXRQChr06\_41524728\_

41525252:0.0263354869)99.8/100:0.0754913776,(HanXRQChr03\_26626677\_26627224:0.034  
9395635,HanXRQChr12\_100245888\_100246277:0.0166097388)96.4/100:0.0357612517)0/86:  
0.0000023219,HanXRQChr14\_47500657\_47501050:0.2182189309)58.7/96:0.0169663155)88.  
8/92:0.0311858915,((((((((HanXRQChr14\_79508506\_79508881:0.0000024012,HanXRQChr15  
\_145112060\_145112588:0.0090655036)85.5/99:0.0090235320,HanXRQChr09\_159439793\_15  
9440170:0.0277548988)75.4/100:0.0045484057,HanXRQChr14\_45570798\_45571311:0.02367  
51792)0/55:0.0000020528,(HanXRQChr16\_170010412\_170010812:0.0276880614,HanXRQChr  
01\_83270623\_83271135:0.0183163890)76/100:0.0044326046)87.5/100:0.0096161891,HanX  
RQChr10\_173822886\_173823254:0.0691609220)75.7/77:0.0041009727,HanXRQChr04\_1471  
40553\_147141079:0.0091228307)80.8/75:0.0046503566,((HanXRQChr09\_59706805\_5970718  
1:0.0262674379,HanXRQChr04\_65301484\_65302016:0.0426551309)77.3/94:0.0057129348,H  
anXRQChr07\_35619467\_35619941:0.0704006968)78.8/85:0.0049505482)0/46:0.0000027258,  
HanXRQChr02\_46053364\_46053773:0.0136005381)0/59:0.0015437312,HanXRQChr10\_1005  
32038\_100532438:0.0355808226)99/100:0.0747574124)3.4/53:0.0051333114,(HanXRQChr15  
\_125481128\_125481695:0.0219796201,HanXRQChr10\_140012131\_140012699:0.005704625  
7)100/100:0.1587220046)89.4/93:0.0314614405,(HanXRQChr15\_153093160\_153093558:0.12  
93605385,HanXRQChr11\_77517539\_77518062:0.0923525484)67.3/94:0.0334935717)56/85:0.  
0104067335,(HanXRQChr09\_48002641\_48003124:0.0000021258,HanXRQChr09\_48019973\_  
48020456:0.0000021295)100/100:0.1654147743)79.8/24:0.0118296754,(HanXRQChr17\_5490  
7212\_54907721:0.0285151925,HanXRQChr09\_50143993\_50144471:0.0364514983)100/100:0  
.0993172491)0/16:0.0000023416,HanXRQChr07\_67769\_68326:0.0950108438)22.7/17:0.0085  
363584)62.1/48:0.0088919563,HanXRQChr10\_170627841\_170628410:0.1055830416)42.2/53:  
0.0578054828,HanXRQChr13\_127794694\_127795300:0.1396943199)100/100:1.5722832740)  
65.6/89:0.0373179738,HanXRQChr12\_94877770\_94878735:0.1681877680)85.8/89:0.0446339  
743)100/100:0.5132205684)54.5/93:0.0861661072)91.2/94:0.0720470808)19.7/50:0.01139462  
64,((((((((((((HanXRQChr16\_150636591\_150640613:0.0224030781,(((HanXRQChr17\_476376  
09\_47642782:0.0129046546,HanXRQChr09\_42030904\_42038738:0.0232429814)0/92:0.0000  
022540,HanXRQChr08\_88220498\_88221890:0.0042367155)86.6/100:0.0083781888,HanXRQ  
Chr15\_74394306\_74402182:0.0176679577)89.6/100:0.0133431160)93.4/100:0.0234694656,H  
anXRQChr05\_177102059\_177102727:0.0081955880)93.6/98:0.0156506186,HanXRQChr05\_1  
99634091\_199642069:0.0042841688)74/98:0.0040548450,HanXRQChr09\_26818251\_268207  
77:0.0304890772)95.2/99:0.0204690079,HanXRQChr03\_34702985\_34703845:0.0400788524)  
4.2/70:0.0037074249,((HanXRQChr17\_164543226\_164545213:0.0040702735,(HanXRQChr11  
\_5059413\_5062302:0.0000022540,HanXRQChr16\_159464039\_159466946:0.0000022540)96.  
6/100:0.0122258768)0/93:0.0000024653,((HanXRQChr04\_4585394\_4586317:0.0131102746,H  
anXRQChr12\_8060455\_8064354:0.0000022540)72/100:0.0043231239,HanXRQChr04\_441427  
3\_4418183:0.0086156592)100/100:0.0557133123)96.9/100:0.0205743286)85.3/97:0.01547181  
02,(((HanXRQChr16\_154231921\_154234094:0.0439071168,(HanXRQChr10\_201208107\_201  
211833:0.0167495056,HanXRQChr06\_1335657\_1337253:0.0350861332)57.7/100:0.00573331  
71)87.4/100:0.0267520050,((HanXRQChr09\_1135754\_1136217:0.0045446099,HanXRQChr09  
\_1132214\_1133064:0.0084856339)99.7/100:0.1178564020,(HanXRQChr14\_171048254\_1710  
55488:0.0682357619,HanXRQChr02\_147305501\_147307299:0.0617559034)98.7/100:0.10994  
54134)97.3/99:0.0762847599)82.4/95:0.0167650395,(HanXRQChr06\_47763415\_47764638:0.0  
362908481,HanXRQChr12\_40589262\_40592252:0.0415747948)97.9/100:0.0426325808)81.3/

96:0.0114053829)85.8/100:0.0191539633,HanXRQChr05\_52352508\_52353847:0.0508567800  
)41.5/96:0.0222784984,HanXRQChr12\_66452661\_66454107:0.0644229184)86.9/100:0.01955  
58591,HanXRQChr03\_153476779\_153477741:0.0639975744)99.8/100:0.0674289736,HanXR  
QChr09\_192317181\_192318492:0.0561199991)80/99:0.0132850951,HanXRQChr09\_1736863  
90\_173688466:0.1039845614)19.5/86:0.0072713624,(HanXRQChr07\_27412393\_27412825:0.  
0085861973,HanXRQChr07\_27480885\_27481317:0.0000021543)100/100:0.4699980741)81.3/  
79:0.0239801038)88.8/95:0.0337404761,((HanXRQChr10\_167996501\_167997306:0.03755533  
39,(HanXRQChr07\_94263537\_94264736:0.0149427312,(((HanXRQChr10\_200122501\_20012  
6511:0.0083095534,HanXRQChr03\_159773788\_159776353:0.0084343562)87.8/100:0.008964  
4963,HanXRQChr16\_117885695\_117887257:0.0102784898)95.2/100:0.0201931407,HanXRQ  
Chr16\_139387141\_139394695:0.0079291516)0/85:0.0000020544,HanXRQChr13\_70292420\_  
70293133:0.0229518795)97/100:0.0375826281)98.8/100:0.0684944733)99.5/100:0.096754148  
1,((((HanXRQChr12\_74630615\_74638291:0.0302273622,(HanXRQChr05\_32799874\_328060  
12:0.0176544566,HanXRQChr05\_66536036\_66536958:0.0223113350)78.8/100:0.0061780324  
)97.9/100:0.0472058129,(HanXRQChr09\_42108185\_42108601:0.0219886635,((HanXRQChr1  
4\_70675600\_70678361:0.0043355838,(HanXRQChr14\_79208902\_79211665:0.0130582144,H  
anXRQChr14\_77501682\_77504443:0.0086855543)0/91:0.0000022540)0/99:0.0000028393,Ha  
nXRQChr02\_175774663\_175777915:0.0174311311)73.9/100:0.0043604256)74/100:0.0057683  
475)71.6/99:0.0454337796,HanXRQChr08\_40489307\_40491198:0.0723470310)99.1/100:0.07  
57246341,(HanXRQChr09\_184856661\_184857251:0.0289399131,HanXRQChr13\_144823475  
\_144824100:0.0244574424)99.8/100:0.0925866405)69.5/81:0.0254972110,(HanXRQChr15\_10  
4285615\_104286058:0.0516518404,HanXRQChr05\_209135841\_209137273:0.0760565209)94  
.7/100:0.0449303399)75.4/57:0.0124000662,HanXRQChr16\_128055830\_128059471:0.200996  
9378)27.1/63:0.0283375352)99.6/100:0.0960555791)95.1/100:0.0612855441)98.8/99:0.051750  
1134)0/93:0.0000020038,HanXRQChr11\_34832223\_34833041:0.0338048647)40.9/98:0.00204  
77769,HanXRQChr03\_69429483\_69433013:0.0156264501)82.6/100:0.0116980942)0/55:0.000  
0024175)90.5/100:0.0139448863,HanXRQChr04\_162448231\_162451209:0.0313534038)97.2/  
100:0.0322695723)89.9/100:0.0231658279,(HanXRQChr13\_159695079\_159696066:0.017694  
6890,HanXRQChr06\_34593592\_34601130:0.0086111503)89.8/100:0.0193474461)95.9/100:0.  
0351968199,((((HanXRQChr07\_27634064\_27638140:0.0000022540,HanXRQChr05\_644166  
93\_64422326:0.0086796800)0/99:0.0000021252,(HanXRQChr15\_23210956\_23213675:0.0043  
601059,HanXRQChr11\_69846093\_69853687:0.0043633653)90.5/99:0.0087291819)18.2/85:0.  
0042935285,(HanXRQChr06\_20451348\_20451704:0.0000022540,HanXRQChr13\_179591469  
\_179595652:0.0087323290)0/97:0.0000021158)91.6/98:0.0086662397,(((HanXRQChr12\_4590  
5678\_45909951:0.0000022540,HanXRQChr15\_74224040\_74228313:0.0000022540)89.6/100:  
0.0086815278,HanXRQChr13\_2986278\_2987762:0.0043292234)0/67:0.0000027322,HanXRQ  
Chr02\_4724981\_4726023:0.0000022540)0/67:0.0000026213)0/80:0.0000020558,HanXRQChr  
13\_135223336\_135224153:0.0358976352)89.8/100:0.0152587729,HanXRQChr13\_196286900  
\_196290049:0.0117779301)96.4/100:0.0305700521)79.2/98:0.0158641778);

## CONSENSUS TREE

-----

Consensus tree is constructed from 1000bootstrap trees

```

|--HanXRQChr01_34887426_34894282
+--| (92)
| | +--HanXRQChr12_24613340_24614343
| +--| (95)
|     +--HanXRQChr08_22937900_22939039
+--| (98)
| +--HanXRQChr13_45702842_45703840
+--| (98)
| | +--HanXRQChr17_205330461_205331450
+--| (100)
| +--HanXRQChr03_26205754_26213308

+--HanXRQChr04_67540092_67541320
+--| (100)
| | +--HanXRQChr06_27984911_27988051
| | +--| (100)
| | | +--HanXRQChr04_12175865_12181403
| | | +--| (55)
| | | | +--HanXRQChr17_211327788_211333859
| | | | +--| (100)
| | | | | +--HanXRQChr05_59284493_59290538
| | | | | +--| (100)
| | | | | +--HanXRQChr05_106376295_106382341
| | | | | +--| (93)
| | | | | +--HanXRQChr09_48889131_48889670
| | | | | +--| (99)
| | | | | +--HanXRQChr15_55516101_55518531
| | | | | +--| (99)
| | | | | +--HanXRQChr03_57480187_57481416
| | | | | +--| (80)
| | | | | | +--HanXRQChr05_166779247_166780763
| | | | | | +--| (100)
| | | | | | +--HanXRQChr12_94875864_94876484
| | | | | | +--| (99)
| | | | | | +--HanXRQChr04_92418435_92419412

```

[illegible]

[illegible]

[illegible]



[illegible]

|                                 |  |            |
|---------------------------------|--|------------|
|                                 |  | +--        |
| HanXRQChr10_85192350_85197513   |  |            |
|                                 |  | +--  (91)  |
|                                 |  | +--        |
| HanXRQChr06_97006962_97010930   |  |            |
|                                 |  | +--  (100) |
|                                 |  | +--        |
| HanXRQChr03_159793635_159795071 |  |            |
|                                 |  | +--  (100) |
|                                 |  | +--        |
| HanXRQChr07_88885423_88893193   |  |            |
|                                 |  | +--  (47)  |
|                                 |  | +--        |
| HanXRQChr08_109696851_109697593 |  |            |
|                                 |  | +--  (100) |
|                                 |  | +--        |
| HanXRQChr08_39439464_39440150   |  |            |
|                                 |  | +--  (95)  |
|                                 |  | +--        |
| HanXRQChr01_140346486_140347133 |  |            |
|                                 |  | +--  (99)  |
|                                 |  | +--        |
| HanXRQChr16_117883570_117885696 |  |            |
|                                 |  | +--  (90)  |
|                                 |  | +--        |
| HanXRQChr10_225800164_225801136 |  |            |
|                                 |  | +--  (82)  |
|                                 |  | +--        |
| HanXRQChr04_79257170_79260978   |  |            |
|                                 |  | +--  (100) |
|                                 |  | +--        |
| HanXRQChr09_141496442_141499885 |  |            |
|                                 |  | +--  (85)  |
|                                 |  | +--        |
| HanXRQChr03_70542853_70547885   |  |            |
|                                 |  | +--  (88)  |
|                                 |  | +--        |
| HanXRQChr07_94262118_94263107   |  |            |
|                                 |  | +--  (99)  |
|                                 |  | +--        |
| HanXRQChr17_170737481_170744938 |  |            |
|                                 |  | +--  (88)  |
|                                 |  | +--        |
| HanXRQChr04_115339901_115344808 |  |            |

[illegible]

[illegible]

[illegible]

|  |                                    |  |  |  |  |  |  |  |  |
|--|------------------------------------|--|--|--|--|--|--|--|--|
|  |                                    |  |  |  |  |  |  |  |  |
|  | +--HanXRQChr09_90613212_90613775   |  |  |  |  |  |  |  |  |
|  |                                    |  |  |  |  |  |  |  |  |
|  | +--  (97)                          |  |  |  |  |  |  |  |  |
|  |                                    |  |  |  |  |  |  |  |  |
|  | +--HanXRQChr14_164972043_164972420 |  |  |  |  |  |  |  |  |
|  |                                    |  |  |  |  |  |  |  |  |
|  | +--  (100)                         |  |  |  |  |  |  |  |  |
|  |                                    |  |  |  |  |  |  |  |  |
|  | +--HanXRQChr17_171676962_171677479 |  |  |  |  |  |  |  |  |
|  |                                    |  |  |  |  |  |  |  |  |
|  | +--  (100)                         |  |  |  |  |  |  |  |  |
|  |                                    |  |  |  |  |  |  |  |  |
|  | +--HanXRQChr04_11014761_11015279   |  |  |  |  |  |  |  |  |
|  |                                    |  |  |  |  |  |  |  |  |
|  | +--  (100)                         |  |  |  |  |  |  |  |  |
|  |                                    |  |  |  |  |  |  |  |  |
|  | +--HanXRQChr04_11235868_11236386   |  |  |  |  |  |  |  |  |
|  |                                    |  |  |  |  |  |  |  |  |
|  | +--  (100)                         |  |  |  |  |  |  |  |  |
|  |                                    |  |  |  |  |  |  |  |  |
|  | +--HanXRQChr10_36325499_36326037   |  |  |  |  |  |  |  |  |
|  |                                    |  |  |  |  |  |  |  |  |
|  | +--  (69)                          |  |  |  |  |  |  |  |  |
|  |                                    |  |  |  |  |  |  |  |  |
|  | +--HanXRQChr09_16583017_16583476   |  |  |  |  |  |  |  |  |
|  |                                    |  |  |  |  |  |  |  |  |
|  | +--  (100)                         |  |  |  |  |  |  |  |  |
|  |                                    |  |  |  |  |  |  |  |  |
|  | +--HanXRQChr02_53194187_53194755   |  |  |  |  |  |  |  |  |
|  |                                    |  |  |  |  |  |  |  |  |
|  | +--  (52)                          |  |  |  |  |  |  |  |  |
|  |                                    |  |  |  |  |  |  |  |  |
|  | +--HanXRQChr15_58262815_58263268   |  |  |  |  |  |  |  |  |
|  |                                    |  |  |  |  |  |  |  |  |
|  | +--  (37)                          |  |  |  |  |  |  |  |  |
|  |                                    |  |  |  |  |  |  |  |  |
|  | +--HanXRQChr03_53881858_53882406   |  |  |  |  |  |  |  |  |
|  |                                    |  |  |  |  |  |  |  |  |
|  | +--  (100)                         |  |  |  |  |  |  |  |  |
|  |                                    |  |  |  |  |  |  |  |  |
|  | +--HanXRQChr15_50520164_50520709   |  |  |  |  |  |  |  |  |
|  |                                    |  |  |  |  |  |  |  |  |
|  | +--  (100)                         |  |  |  |  |  |  |  |  |

|  |  |  |  |   |    |                                 |  |  |  |
|--|--|--|--|---|----|---------------------------------|--|--|--|
|  |  |  |  |   |    |                                 |  |  |  |
|  |  |  |  | + | -- | HanXRQChr08_58106590_58107151   |  |  |  |
|  |  |  |  |   |    |                                 |  |  |  |
|  |  |  |  | + | -- | (68)                            |  |  |  |
|  |  |  |  |   |    |                                 |  |  |  |
|  |  |  |  | + | -- | HanXRQChr04_117734534_117735067 |  |  |  |
|  |  |  |  |   |    |                                 |  |  |  |
|  |  |  |  | + | -- | (58)                            |  |  |  |
|  |  |  |  |   |    |                                 |  |  |  |
|  |  |  |  | + | -- | HanXRQChr07_39909716_39910258   |  |  |  |
|  |  |  |  |   |    |                                 |  |  |  |
|  |  |  |  | + | -- | (53)                            |  |  |  |
|  |  |  |  |   |    |                                 |  |  |  |
|  |  |  |  | + | -- | HanXRQChr11_114599910_114600468 |  |  |  |
|  |  |  |  |   |    |                                 |  |  |  |
|  |  |  |  | + | -- | (34)                            |  |  |  |
|  |  |  |  |   |    |                                 |  |  |  |
|  |  |  |  | + | -- | HanXRQChr08_102456485_102456998 |  |  |  |
|  |  |  |  |   |    |                                 |  |  |  |
|  |  |  |  | + | -- | (95)                            |  |  |  |
|  |  |  |  |   |    |                                 |  |  |  |
|  |  |  |  | + | -- | HanXRQChr03_6367591_6368162     |  |  |  |
|  |  |  |  |   |    |                                 |  |  |  |
|  |  |  |  | + | -- | (95)                            |  |  |  |
|  |  |  |  |   |    |                                 |  |  |  |
|  |  |  |  | + | -- | HanXRQChr08_32332017_32332576   |  |  |  |
|  |  |  |  |   |    |                                 |  |  |  |
|  |  |  |  | + | -- | (100)                           |  |  |  |
|  |  |  |  |   |    |                                 |  |  |  |
|  |  |  |  | + | -- | HanXRQChr05_142623602_142624161 |  |  |  |
|  |  |  |  |   |    |                                 |  |  |  |
|  |  |  |  | + | -- | (60)                            |  |  |  |
|  |  |  |  |   |    |                                 |  |  |  |
|  |  |  |  | + | -- | HanXRQChr10_160816414_160816781 |  |  |  |
|  |  |  |  |   |    |                                 |  |  |  |
|  |  |  |  | + | -- | (99)                            |  |  |  |
|  |  |  |  |   |    |                                 |  |  |  |
|  |  |  |  | + | -- | HanXRQChr09_205724496_205724897 |  |  |  |
|  |  |  |  |   |    |                                 |  |  |  |
|  |  |  |  | + | -- | (57)                            |  |  |  |
|  |  |  |  |   |    |                                 |  |  |  |
|  |  |  |  | + | -- | HanXRQChr05_5609714_5610098     |  |  |  |
|  |  |  |  |   |    |                                 |  |  |  |
|  |  |  |  | + | -- | (100)                           |  |  |  |

[illegible]



|           |                                    |  |  |     |
|-----------|------------------------------------|--|--|-----|
|           |                                    |  |  |     |
|           | +--HanXRQChr07_12736562_12737068   |  |  |     |
|           |                                    |  |  |     |
|           | +--  (100)                         |  |  |     |
|           |                                    |  |  |     |
|           | +--HanXRQChr05_164461706_164462192 |  |  |     |
|           |                                    |  |  |     |
| (55)      |                                    |  |  | +-- |
|           |                                    |  |  |     |
|           | +--HanXRQChr13_134302109_134302509 |  |  |     |
|           |                                    |  |  |     |
|           | +--  (100)                         |  |  |     |
|           |                                    |  |  |     |
|           | +--HanXRQChr10_95181243_95181772   |  |  |     |
|           |                                    |  |  |     |
|           | +--  (100)                         |  |  |     |
|           |                                    |  |  |     |
|           | +--HanXRQChr17_160614824_160615353 |  |  |     |
|           |                                    |  |  |     |
| +--  (51) |                                    |  |  |     |
|           |                                    |  |  |     |
|           | +--HanXRQChr17_13361200_13361728   |  |  |     |
|           |                                    |  |  |     |
|           | +--  (100)                         |  |  |     |
|           |                                    |  |  |     |
|           | +--HanXRQChr12_75917343_75917873   |  |  |     |
|           |                                    |  |  |     |
|           | +--  (100)                         |  |  |     |
|           |                                    |  |  |     |
|           | +--HanXRQChr14_86341928_86342457   |  |  |     |
|           |                                    |  |  |     |
|           | +--  (100)                         |  |  |     |
|           |                                    |  |  |     |
|           | +--HanXRQChr03_99988684_99989213   |  |  |     |
|           |                                    |  |  |     |
|           | +--  (100)                         |  |  |     |
|           |                                    |  |  |     |
|           | +--HanXRQChr17_99228227_99228757   |  |  |     |
|           |                                    |  |  |     |
| +--  (92) |                                    |  |  |     |
|           |                                    |  |  |     |
|           | +--HanXRQChr16_15638745_15639274   |  |  |     |
|           |                                    |  |  |     |
|           | +--  (100)                         |  |  |     |

|                                  |                                    |  |     |
|----------------------------------|------------------------------------|--|-----|
|                                  |                                    |  |     |
|                                  | +--HanXRQChr05_144936503_144937032 |  |     |
|                                  |                                    |  |     |
| +--  (100)                       |                                    |  |     |
|                                  |                                    |  |     |
|                                  | +--HanXRQChr02_114840517_114841046 |  |     |
|                                  |                                    |  |     |
| (56)                             |                                    |  |     |
|                                  |                                    |  |     |
|                                  | +--HanXRQChr11_55711325_55711859   |  |     |
|                                  |                                    |  |     |
|                                  | +--  (73)                          |  |     |
|                                  |                                    |  |     |
|                                  | +--HanXRQChr01_29157382_29157877   |  |     |
|                                  |                                    |  |     |
|                                  | +--  (98)                          |  |     |
|                                  |                                    |  |     |
|                                  | +--HanXRQChr13_104941607_104942137 |  |     |
|                                  |                                    |  |     |
|                                  | +--  (66)                          |  |     |
|                                  |                                    |  |     |
|                                  | +--HanXRQChr08_25571094_25571648   |  |     |
|                                  |                                    |  |     |
|                                  | +--  (100)                         |  |     |
|                                  |                                    |  |     |
|                                  | +--HanXRQChr05_44360152_44360708   |  |     |
|                                  |                                    |  |     |
|                                  | +--  (53)                          |  |     |
|                                  |                                    |  |     |
|                                  | +--HanXRQChr10_187118315_187118736 |  |     |
|                                  |                                    |  | +-- |
| (42)                             |                                    |  |     |
|                                  |                                    |  |     |
|                                  | +--HanXRQChr09_8264746_8265314     |  |     |
|                                  |                                    |  | +-- |
| (100)                            |                                    |  |     |
|                                  |                                    |  |     |
| +--HanXRQChr16_71647538_71648109 |                                    |  |     |
|                                  |                                    |  | +-- |
| (77)                             |                                    |  |     |
|                                  |                                    |  |     |
|                                  | +--HanXRQChr13_88688183_88688669   |  |     |
|                                  |                                    |  |     |
|                                  | +--  (100)                         |  |     |

|       |                                    |  |  |  |            |
|-------|------------------------------------|--|--|--|------------|
|       |                                    |  |  |  |            |
|       | +--HanXRQChr17_31920748_31921235   |  |  |  |            |
|       |                                    |  |  |  | +--        |
| (57)  |                                    |  |  |  |            |
|       |                                    |  |  |  |            |
|       | +--HanXRQChr17_84099735_84100241   |  |  |  |            |
|       |                                    |  |  |  | +--        |
| (99)  |                                    |  |  |  |            |
|       |                                    |  |  |  |            |
|       | +--HanXRQChr10_11267406_11267923   |  |  |  |            |
|       |                                    |  |  |  | +--        |
| (84)  |                                    |  |  |  |            |
|       |                                    |  |  |  |            |
|       | +--HanXRQChr02_131243878_131244246 |  |  |  |            |
|       |                                    |  |  |  |            |
|       | +--  (100)                         |  |  |  |            |
|       |                                    |  |  |  |            |
|       | +--HanXRQChr10_168209872_168210240 |  |  |  |            |
|       |                                    |  |  |  | +--        |
| (90)  |                                    |  |  |  |            |
|       |                                    |  |  |  |            |
|       | +--HanXRQChr08_113839738_113840105 |  |  |  |            |
|       |                                    |  |  |  | +--        |
| (96)  |                                    |  |  |  |            |
|       |                                    |  |  |  |            |
|       | +--HanXRQChr04_28158629_28159233   |  |  |  |            |
|       |                                    |  |  |  | +--        |
| (100) |                                    |  |  |  |            |
|       |                                    |  |  |  |            |
|       | +--HanXRQChr11_39830792_39831397   |  |  |  |            |
|       |                                    |  |  |  | +--  (64)  |
|       |                                    |  |  |  | +--        |
|       | HanXRQChr11_133792609_133792984    |  |  |  |            |
|       |                                    |  |  |  | +--        |
| (100) |                                    |  |  |  |            |
|       |                                    |  |  |  | +--        |
|       | HanXRQChr11_133775764_133776143    |  |  |  |            |
|       |                                    |  |  |  | +--  (100) |
|       |                                    |  |  |  | +--        |
|       | HanXRQChr05_62558786_62559318      |  |  |  |            |
|       |                                    |  |  |  | +--  (100) |
|       |                                    |  |  |  | +--        |
|       | HanXRQChr09_124910897_124911250    |  |  |  |            |

|                                    |  |  |  |            |
|------------------------------------|--|--|--|------------|
| (100)                              |  |  |  | +--        |
|                                    |  |  |  | +--        |
| HanXRQChr11_30817527_30817892      |  |  |  |            |
|                                    |  |  |  | +--  (80)  |
|                                    |  |  |  | +--        |
| HanXRQChr17_68193643_68194142      |  |  |  |            |
|                                    |  |  |  | +--  (100) |
|                                    |  |  |  | +--        |
| HanXRQChr11_94539491_94539990      |  |  |  |            |
|                                    |  |  |  | +--  (39)  |
|                                    |  |  |  |            |
| +--HanXRQChr01_40849696_40850225   |  |  |  |            |
|                                    |  |  |  | +--        |
| (90)                               |  |  |  |            |
|                                    |  |  |  | +--        |
| HanXRQChr11_135844467_135845030    |  |  |  |            |
|                                    |  |  |  | +--        |
| (100)                              |  |  |  |            |
|                                    |  |  |  | +--        |
| HanXRQChr16_45835607_45836135      |  |  |  |            |
|                                    |  |  |  | +--        |
| (100)                              |  |  |  |            |
|                                    |  |  |  |            |
| +--HanXRQChr04_141436125_141436654 |  |  |  |            |
|                                    |  |  |  | +--        |
| (79)                               |  |  |  |            |
|                                    |  |  |  | +--        |
| HanXRQChr14_73178118_73178607      |  |  |  |            |
|                                    |  |  |  | +--  (41)  |
|                                    |  |  |  | +--        |
| HanXRQChr09_74883466_74883949      |  |  |  |            |
|                                    |  |  |  | +--        |
| (100)                              |  |  |  |            |
|                                    |  |  |  | +--        |
| HanXRQChr05_179907532_179908035    |  |  |  |            |
|                                    |  |  |  | +--  (25)  |
|                                    |  |  |  | +--        |
| HanXRQChr10_170724767_170725228    |  |  |  |            |
|                                    |  |  |  | +--        |
| (95)                               |  |  |  |            |
|                                    |  |  |  | +--        |
| HanXRQChr11_114441513_114442047    |  |  |  |            |

[illegible]

[illegible]

|       |                                    |  |  |  |  |  |  |     |
|-------|------------------------------------|--|--|--|--|--|--|-----|
|       |                                    |  |  |  |  |  |  |     |
|       | +--HanXRQChr07_94174100_94174724   |  |  |  |  |  |  |     |
| (63)  |                                    |  |  |  |  |  |  | +-- |
|       |                                    |  |  |  |  |  |  | +-- |
|       | HanXRQChr17_139322691_139323166    |  |  |  |  |  |  |     |
|       |                                    |  |  |  |  |  |  | +-- |
| (100) |                                    |  |  |  |  |  |  |     |
|       | +--HanXRQChr10_145087013_145087418 |  |  |  |  |  |  |     |
|       |                                    |  |  |  |  |  |  |     |
|       | +--  (100)                         |  |  |  |  |  |  |     |
|       |                                    |  |  |  |  |  |  |     |
|       | +--HanXRQChr10_175382210_175382618 |  |  |  |  |  |  |     |
|       |                                    |  |  |  |  |  |  | +-- |
| (100) |                                    |  |  |  |  |  |  |     |
|       | +--HanXRQChr06_56355680_56356069   |  |  |  |  |  |  |     |
|       |                                    |  |  |  |  |  |  | +-- |
| (93)  |                                    |  |  |  |  |  |  |     |
|       | +--HanXRQChr17_95938863_95939232   |  |  |  |  |  |  |     |
|       |                                    |  |  |  |  |  |  |     |
|       | +--  (99)                          |  |  |  |  |  |  |     |
|       |                                    |  |  |  |  |  |  |     |
|       | +--HanXRQChr13_144225259_144225863 |  |  |  |  |  |  |     |
|       |                                    |  |  |  |  |  |  | +-- |
| (92)  |                                    |  |  |  |  |  |  |     |
|       | +--HanXRQChr15_52286990_52287513   |  |  |  |  |  |  |     |
|       |                                    |  |  |  |  |  |  |     |
|       | +--  (100)                         |  |  |  |  |  |  |     |
|       |                                    |  |  |  |  |  |  |     |
|       | +--HanXRQChr09_19029933_19030470   |  |  |  |  |  |  |     |
|       |                                    |  |  |  |  |  |  |     |
|       | +--  (100)                         |  |  |  |  |  |  |     |
|       |                                    |  |  |  |  |  |  |     |
|       | +--HanXRQChr09_126494259_126494796 |  |  |  |  |  |  |     |
|       |                                    |  |  |  |  |  |  |     |
|       | +--  (100)                         |  |  |  |  |  |  |     |
|       |                                    |  |  |  |  |  |  |     |
|       | +--HanXRQChr06_41524728_41525252   |  |  |  |  |  |  |     |
|       |                                    |  |  |  |  |  |  | +-- |
| (86)  |                                    |  |  |  |  |  |  |     |

[illegible]



| Chromosome  | Start     | End       | Strand | Gene                            | Feature | Score |
|-------------|-----------|-----------|--------|---------------------------------|---------|-------|
| HanXRQChr09 | 59706805  | 59707181  | +      | HanXRQChr09_59706805_59707181   |         |       |
| (94)        |           |           |        |                                 |         |       |
| HanXRQChr04 | 65301484  | 65302016  | +      | HanXRQChr04_65301484_65302016   |         |       |
| (85)        |           |           |        |                                 |         |       |
| HanXRQChr07 | 35619467  | 35619941  | +      | HanXRQChr07_35619467_35619941   |         |       |
|             |           |           |        |                                 |         |       |
| HanXRQChr02 | 46053364  | 46053773  | +      | HanXRQChr02_46053364_46053773   |         |       |
|             |           |           |        |                                 |         |       |
| HanXRQChr10 | 100532038 | 100532438 | +      | HanXRQChr10_100532038_100532438 |         |       |
|             |           |           |        |                                 |         |       |
| HanXRQChr15 | 125481128 | 125481695 | +      | HanXRQChr15_125481128_125481695 |         |       |
|             |           |           |        |                                 |         |       |
| HanXRQChr10 | 140012131 | 140012699 | +      | HanXRQChr10_140012131_140012699 |         |       |
|             |           |           |        |                                 |         |       |
| HanXRQChr15 | 153093160 | 153093558 | +      | HanXRQChr15_153093160_153093558 |         |       |
|             |           |           |        |                                 |         |       |
| HanXRQChr11 | 77517539  | 77518062  | +      | HanXRQChr11_77517539_77518062   |         |       |
|             |           |           |        |                                 |         |       |
| HanXRQChr17 | 54907212  | 54907721  | +      | HanXRQChr17_54907212_54907721   |         |       |
|             |           |           |        |                                 |         |       |
| HanXRQChr09 | 50143993  | 50144471  | +      | HanXRQChr09_50143993_50144471   |         |       |
|             |           |           |        |                                 |         |       |
| HanXRQChr07 | 67769     | 68326     | +      | HanXRQChr07_67769_68326         |         |       |
|             |           |           |        |                                 |         |       |
| HanXRQChr10 | 170627841 | 170628410 | +      | HanXRQChr10_170627841_170628410 |         |       |
|             |           |           |        |                                 |         |       |
| HanXRQChr13 | 127794694 | 127795300 | +      | HanXRQChr13_127794694_127795300 |         |       |
|             |           |           |        |                                 |         |       |

|                                 |  |  |  |  |  |           |
|---------------------------------|--|--|--|--|--|-----------|
|                                 |  |  |  |  |  |           |
|                                 |  |  |  |  |  | +--  (95) |
|                                 |  |  |  |  |  |           |
| HanXRQChr16_150636591_150640613 |  |  |  |  |  |           |
|                                 |  |  |  |  |  |           |
|                                 |  |  |  |  |  |           |
| HanXRQChr17_47637609_47642782   |  |  |  |  |  |           |
|                                 |  |  |  |  |  |           |
|                                 |  |  |  |  |  |           |
| HanXRQChr09_42030904_42038738   |  |  |  |  |  |           |
|                                 |  |  |  |  |  |           |
|                                 |  |  |  |  |  |           |
| HanXRQChr08_88220498_88221890   |  |  |  |  |  |           |
|                                 |  |  |  |  |  |           |
|                                 |  |  |  |  |  |           |
| HanXRQChr15_74394306_74402182   |  |  |  |  |  |           |
|                                 |  |  |  |  |  |           |
|                                 |  |  |  |  |  |           |
| HanXRQChr05_177102059_177102727 |  |  |  |  |  |           |
|                                 |  |  |  |  |  |           |
|                                 |  |  |  |  |  |           |
| HanXRQChr05_199634091_199642069 |  |  |  |  |  |           |
|                                 |  |  |  |  |  |           |
|                                 |  |  |  |  |  |           |
|                                 |  |  |  |  |  |           |
|                                 |  |  |  |  |  |           |
|                                 |  |  |  |  |  |           |
|                                 |  |  |  |  |  |           |
|                                 |  |  |  |  |  |           |
|                                 |  |  |  |  |  |           |
| HanXRQChr04_4585394_4586317     |  |  |  |  |  |           |
|                                 |  |  |  |  |  |           |
|                                 |  |  |  |  |  |           |
|                                 |  |  |  |  |  |           |
|                                 |  |  |  |  |  |           |
|                                 |  |  |  |  |  |           |
|                                 |  |  |  |  |  |           |
|                                 |  |  |  |  |  |           |
|                                 |  |  |  |  |  |           |
| HanXRQChr10_201208107_201211833 |  |  |  |  |  |           |

|                                  |                                  |                                    |                                    |  |  |  |
|----------------------------------|----------------------------------|------------------------------------|------------------------------------|--|--|--|
| +--HanXRQChr12_94877770_94878735 |                                  |                                    |                                    |  |  |  |
| +--                              |                                  |                                    |                                    |  |  |  |
| +--  (100)                       |                                  |                                    |                                    |  |  |  |
|                                  |                                  | +--                                |                                    |  |  |  |
| +--  (92)                        |                                  |                                    |                                    |  |  |  |
|                                  |                                  | +--                                |                                    |  |  |  |
| +--  (100)                       |                                  |                                    |                                    |  |  |  |
|                                  |                                  | +--                                |                                    |  |  |  |
| +--  (100)                       |                                  |                                    |                                    |  |  |  |
|                                  | +--                              |                                    |                                    |  |  |  |
| +--  (98)                        |                                  |                                    |                                    |  |  |  |
|                                  | +--                              |                                    |                                    |  |  |  |
| +--  (98)                        |                                  |                                    |                                    |  |  |  |
|                                  | +--                              |                                    |                                    |  |  |  |
| +--  (99)                        |                                  |                                    |                                    |  |  |  |
|                                  | +--HanXRQChr09_26818251_26820777 |                                    |                                    |  |  |  |
| +--  (70)                        |                                  |                                    |                                    |  |  |  |
|                                  | +--HanXRQChr03_34702985_34703845 |                                    |                                    |  |  |  |
| +--  (97)                        |                                  |                                    |                                    |  |  |  |
|                                  |                                  | +--HanXRQChr17_164543226_164545213 |                                    |  |  |  |
|                                  |                                  | +--  (93)                          |                                    |  |  |  |
|                                  |                                  |                                    | +--HanXRQChr11_5059413_5062302     |  |  |  |
|                                  |                                  |                                    | +--  (100)                         |  |  |  |
|                                  |                                  |                                    | +--HanXRQChr16_159464039_159466946 |  |  |  |
|                                  | +--  (100)                       |                                    |                                    |  |  |  |
|                                  |                                  | +--                                |                                    |  |  |  |
|                                  |                                  | +--  (100)                         |                                    |  |  |  |
|                                  |                                  | +--HanXRQChr12_8060455_8064354     |                                    |  |  |  |
|                                  | +--  (100)                       |                                    |                                    |  |  |  |
|                                  | +--HanXRQChr04_4414273_4418183   |                                    |                                    |  |  |  |
| +--  (100)                       |                                  |                                    |                                    |  |  |  |
|                                  |                                  | +--HanXRQChr16_154231921_154234094 |                                    |  |  |  |
|                                  |                                  | +--  (100)                         |                                    |  |  |  |
|                                  |                                  |                                    | +--                                |  |  |  |

|                                 |  |  |  |  |  |  |  |  |  |                                    |
|---------------------------------|--|--|--|--|--|--|--|--|--|------------------------------------|
|                                 |  |  |  |  |  |  |  |  |  | +--  (100)                         |
|                                 |  |  |  |  |  |  |  |  |  | +--                                |
| HanXRQChr06_1335657_1337253     |  |  |  |  |  |  |  |  |  |                                    |
|                                 |  |  |  |  |  |  |  |  |  | +--  (95)                          |
|                                 |  |  |  |  |  |  |  |  |  | +--HanXRQChr09_1135754_1136217     |
|                                 |  |  |  |  |  |  |  |  |  | +--  (100)                         |
|                                 |  |  |  |  |  |  |  |  |  | +--HanXRQChr09_1132214_1133064     |
|                                 |  |  |  |  |  |  |  |  |  | +--  (99)                          |
|                                 |  |  |  |  |  |  |  |  |  | +--                                |
| HanXRQChr14_171048254_171055488 |  |  |  |  |  |  |  |  |  |                                    |
|                                 |  |  |  |  |  |  |  |  |  | +--  (100)                         |
|                                 |  |  |  |  |  |  |  |  |  | +--HanXRQChr02_147305501_147307299 |
|                                 |  |  |  |  |  |  |  |  |  | +--  (96)                          |
|                                 |  |  |  |  |  |  |  |  |  | +--HanXRQChr06_47763415_47764638   |
|                                 |  |  |  |  |  |  |  |  |  | +--  (100)                         |
|                                 |  |  |  |  |  |  |  |  |  | +--HanXRQChr12_40589262_40592252   |
|                                 |  |  |  |  |  |  |  |  |  | +--  (96)                          |
|                                 |  |  |  |  |  |  |  |  |  | +--HanXRQChr05_52352508_52353847   |
|                                 |  |  |  |  |  |  |  |  |  | +--  (100)                         |
|                                 |  |  |  |  |  |  |  |  |  | +--HanXRQChr12_66452661_66454107   |
|                                 |  |  |  |  |  |  |  |  |  | +--  (100)                         |
|                                 |  |  |  |  |  |  |  |  |  | +--HanXRQChr03_153476779_153477741 |
|                                 |  |  |  |  |  |  |  |  |  | +--  (99)                          |
|                                 |  |  |  |  |  |  |  |  |  | +--HanXRQChr09_192317181_192318492 |
|                                 |  |  |  |  |  |  |  |  |  | +--  (86)                          |
|                                 |  |  |  |  |  |  |  |  |  | +--HanXRQChr09_173686390_173688466 |
|                                 |  |  |  |  |  |  |  |  |  | +--  (79)                          |
|                                 |  |  |  |  |  |  |  |  |  | +--HanXRQChr07_27412393_27412825   |
|                                 |  |  |  |  |  |  |  |  |  | +-----  (100)                      |
|                                 |  |  |  |  |  |  |  |  |  | +--HanXRQChr07_27480885_27481317   |
|                                 |  |  |  |  |  |  |  |  |  | +--  (100)                         |
|                                 |  |  |  |  |  |  |  |  |  | +--HanXRQChr10_167996501_167997306 |
|                                 |  |  |  |  |  |  |  |  |  | +--  (100)                         |
|                                 |  |  |  |  |  |  |  |  |  | +--HanXRQChr07_94263537_94264736   |
|                                 |  |  |  |  |  |  |  |  |  | +--  (100)                         |
|                                 |  |  |  |  |  |  |  |  |  | +--HanXRQChr10_200122501_200126511 |
|                                 |  |  |  |  |  |  |  |  |  | +--  (100)                         |
|                                 |  |  |  |  |  |  |  |  |  | +--HanXRQChr03_159773788_159776353 |
|                                 |  |  |  |  |  |  |  |  |  | +--  (100)                         |
|                                 |  |  |  |  |  |  |  |  |  | +--HanXRQChr16_117885695_117887257 |
|                                 |  |  |  |  |  |  |  |  |  | +--  (85)                          |
|                                 |  |  |  |  |  |  |  |  |  | +--HanXRQChr16_139387141_139394695 |
|                                 |  |  |  |  |  |  |  |  |  | +--  (100)                         |
|                                 |  |  |  |  |  |  |  |  |  | +--HanXRQChr13_70292420_70293133   |

|  |  |  |  |  |  |                                   |
|--|--|--|--|--|--|-----------------------------------|
|  |  |  |  |  |  | +-  (100)                         |
|  |  |  |  |  |  | +-HanXRQChr12_74630615_74638291   |
|  |  |  |  |  |  | +-  (100)                         |
|  |  |  |  |  |  | +-HanXRQChr05_32799874_32806012   |
|  |  |  |  |  |  | +-  (100)                         |
|  |  |  |  |  |  | +-HanXRQChr05_66536036_66536958   |
|  |  |  |  |  |  | +-  (99)                          |
|  |  |  |  |  |  | +-HanXRQChr09_42108185_42108601   |
|  |  |  |  |  |  | +-  (100)                         |
|  |  |  |  |  |  | +-HanXRQChr14_70675600_70678361   |
|  |  |  |  |  |  | +-  (99)                          |
|  |  |  |  |  |  | +-HanXRQChr14_79208902_79211665   |
|  |  |  |  |  |  | +-  (91)                          |
|  |  |  |  |  |  | +-HanXRQChr14_77501682_77504443   |
|  |  |  |  |  |  | +-  (100)                         |
|  |  |  |  |  |  | +-HanXRQChr02_175774663_175777915 |
|  |  |  |  |  |  | +-  (100)                         |
|  |  |  |  |  |  | +-HanXRQChr08_40489307_40491198   |
|  |  |  |  |  |  | +-  (81)                          |
|  |  |  |  |  |  | +-HanXRQChr09_184856661_184857251 |
|  |  |  |  |  |  | +-  (100)                         |
|  |  |  |  |  |  | +-HanXRQChr13_144823475_144824100 |
|  |  |  |  |  |  | +-  (57)                          |
|  |  |  |  |  |  | +-HanXRQChr15_104285615_104286058 |
|  |  |  |  |  |  | +-  (100)                         |
|  |  |  |  |  |  | +-HanXRQChr05_209135841_209137273 |
|  |  |  |  |  |  | +-  (63)                          |
|  |  |  |  |  |  | +-HanXRQChr16_128055830_128059471 |
|  |  |  |  |  |  | +-  (98)                          |
|  |  |  |  |  |  | +-HanXRQChr11_34832223_34833041   |
|  |  |  |  |  |  | +-  (100)                         |
|  |  |  |  |  |  | +-HanXRQChr03_69429483_69433013   |
|  |  |  |  |  |  | +-  (100)                         |
|  |  |  |  |  |  | +-HanXRQChr04_162448231_162451209 |
|  |  |  |  |  |  | +-  (100)                         |
|  |  |  |  |  |  | +-HanXRQChr13_159695079_159696066 |
|  |  |  |  |  |  | +-  (100)                         |
|  |  |  |  |  |  | +-HanXRQChr06_34593592_34601130   |
|  |  |  |  |  |  | +-  (98)                          |
|  |  |  |  |  |  | +-HanXRQChr07_27634064_27638140   |
|  |  |  |  |  |  | +-  (99)                          |
|  |  |  |  |  |  | +-HanXRQChr05_64416693_64422326   |
|  |  |  |  |  |  | +-  (85)                          |
|  |  |  |  |  |  | +-HanXRQChr15_23210956_23213675   |

```

|   | +--| (99)
|   |     +--HanXRQChr11_69846093_69853687
|   +--| (98)
|   | | +--HanXRQChr06_20451348_20451704
|   | | +--| (97)
|   | |     +--HanXRQChr13_179591469_179595652
|   +--| (80)
|   | |     +--HanXRQChr12_45905678_45909951
|   | |     +--| (100)
|   | | | +--HanXRQChr15_74224040_74228313
|   | | | +--| (67)
|   | | | | +--HanXRQChr13_2986278_2987762
|   | | | +--| (67)
|   | |     +--HanXRQChr02_4724981_4726023
|   +--| (100)
| | +--HanXRQChr13_135223336_135224153
+--| (100)
    +--HanXRQChr13_196286900_196290049

```

Consensus tree in newick format:

```

(HanXRQChr11_78963679_78964101:0.0407041958,((((HanXRQChr01_34887426_34894282:
0.0043216127,(HanXRQChr12_24613340_24614343:0.0000022537,HanXRQChr08_22937900
_22939039:0.0000022537)95:0.0000022537)92:0.0000022537,HanXRQChr13_45702842_457
03840:0.0086610080)98:0.0043188648,HanXRQChr17_205330461_205331450:0.0047369591
)98:0.0000025735,HanXRQChr03_26205754_26213308:0.0130666556)100:0.0048626091,(((H
anXRQChr04_67540092_67541320:0.0215906904,((HanXRQChr06_27984911_27988051:0.0
130523062,(HanXRQChr04_12175865_12181403:0.0223508270,((((HanXRQChr17_21132778
8_211333859:0.0130875744,(HanXRQChr05_59284493_59290538:0.0000022537,HanXRQC
hr05_106376295_106382341:0.0000022537)100:0.0270169043)100:0.0148907682,((HanXRQC
hr09_48889131_48889670:0.0525394261,HanXRQChr15_55516101_55518531:0.0430714462
)99:0.0253405579,((((((HanXRQChr03_57480187_57481416:0.0472729932,(HanXRQChr05_1
66779247_166780763:0.0867630203,HanXRQChr12_94875864_94876484:0.1078338990)100
:0.0113747932)80:0.0000022785,(HanXRQChr04_92418435_92419412:0.0044568713,(HanX
RQChr06_53262309_53263292:0.0000022537,HanXRQChr05_9034545_9035531:0.00877214
61)100:0.0042802153)100:0.1907893785)99:0.0118954381,HanXRQChr11_113608046_11360
8769:0.0918252109)99:0.0436748954,((((HanXRQChr16_94477431_94477942:0.1505603506,
((((HanXRQChr17_67579875_67582613:0.0705704174,HanXRQChr11_142203384_14220425
6:0.1224230204)100:0.0970366901,HanXRQChr04_176555457_176557628:0.0486864534)88:
0.0000025328,HanXRQChr01_116026086_116027124:0.0273426427)96:0.0044701809,HanX
RQChr13_137859189_137859594:0.0259877896)100:0.1109987881)96:0.0095491150,HanXR
QChr10_152624866_152626709:0.0606197636)97:0.0221861088,((((HanXRQChr07_57474618
_57475394:0.0178254193,HanXRQChr07_57434299_57438258:0.0264921642)100:0.0085554

```

375,(HanXRQChr05\_190757444\_190758598:0.0133384192,(HanXRQChr13\_94278579\_94280493:0.0207149214,HanXRQChr04\_115355662\_115358538:0.0307048521)100:0.0687027690)100:0.0045744801)100:0.0236252646,(((HanXRQChr11\_18867372\_18868580:0.0000022537,HanXRQChr02\_20281946\_20283260:0.0000022537)73:0.0000022537,HanXRQChr11\_18749900\_18751215:0.0043147530)100:0.0367658568,HanXRQChr06\_28223014\_28227854:0.0254738083)98:0.0136345033)98:0.0439648850)100:0.1938359137,((HanXRQChr12\_88474680\_88475105:0.2931866118,(((HanXRQChr01\_1207903\_1208488:0.0260071966,(HanXRQChr08\_151986814\_151987353:0.0275982897,HanXRQChr10\_94811711\_94812246:0.0584141556)100:0.0419304710)99:0.0182141824,(HanXRQChr05\_168861330\_168861873:0.0563680311,(HanXRQChr05\_193946694\_193947239:0.0212249450,HanXRQChr05\_193733456\_193734002:0.0141769226)100:0.0272066595)100:0.0660934620)99:0.0459246388,HanXRQChr05\_182283860\_182284319:0.0972767973)99:0.0764079730,(HanXRQChr17\_105500849\_105501312:0.0617044719,((HanXRQChr04\_16618909\_16619279:0.0383384736,(HanXRQChr01\_146764857\_146765256:0.0085877417,((HanXRQChr03\_20364521\_20364920:0.0000022537,HanXRQChr16\_185568115\_185568603:0.0000022622)43:0.0000022622,HanXRQChr05\_14305976\_14306375:0.0000022537)76:0.0000022622)100:0.4700976608)60:0.0299887631,HanXRQChr03\_113315527\_113315992:0.0979768543)62:0.0256505223)98:0.0825628859)100:0.4703979647)99:0.1593908517,((((HanXRQChr02\_175754451\_175758707:0.0522363276,HanXRQChr13\_94161763\_94165162:0.0309730644)93:0.0476628793,(HanXRQChr11\_38886892\_38889248:0.0571140913,(HanXRQChr05\_164509744\_164514326:0.0779891157,HanXRQChr03\_34772558\_34773468:0.1549721412)82:0.0308452319)93:0.0472341380)68:0.0295422754,(((HanXRQChr08\_33398524\_33406006:0.0270813022,HanXRQChr12\_40586043\_40589256:0.0260993930)100:0.0257719003,(HanXRQChr13\_77076783\_77077636:0.0532649324,((((HanXRQChr10\_115966867\_115967362:0.0275064060,HanXRQChr14\_68245992\_68247226:0.0370153066)34:0.0000022537,HanXRQChr01\_49628126\_49635945:0.0091026298)47:0.0000022537,(HanXRQChr09\_125961449\_125964480:0.0325582453,((HanXRQChr06\_28014629\_28015962:0.0326657486,HanXRQChr11\_23461540\_23465141:0.0135691315)100:0.0046413399,HanXRQChr04\_166379772\_166382442:0.0562977037)76:0.0042229370)70:0.0045944846)45:0.0000022537,HanXRQChr17\_164520103\_164521773:0.0327696860)76:0.0057405918,((HanXRQChr04\_174582120\_174583103:0.0491440783,HanXRQChr13\_135224556\_135226019:0.1027102172)99:0.0229032476,(HanXRQChr07\_11945240\_11945839:0.0472900098,HanXRQChr05\_23977914\_23979210:0.0670046207)100:0.0177040799)78:0.0104855965)99:0.0119038213)100:0.0409555744)85:0.0045324648,HanXRQChr03\_50693386\_50694309:0.0148690036)99:0.0340640102,HanXRQChr08\_40474325\_40480066:0.0768331491)98:0.0253930455)91:0.0863217330,((((((HanXRQChr02\_24653810\_24657437:0.0044902217,(HanXRQChr14\_68289895\_68297518:0.0090479945,HanXRQChr14\_68273516\_68281146:0.0136927985)100:0.0091446896)100:0.0092896446,((((((HanXRQChr02\_147295547\_147297741:0.0000022537,HanXRQChr09\_142942803\_142944567:0.0000022537)100:0.0091718400,HanXRQChr13\_96620660\_96621156:0.0136199356)100:0.0044535043,HanXRQChr04\_132271481\_132272204:0.0182922795)100:0.0132211382,HanXRQChr14\_153324342\_153328229:0.0223024647)100:0.0061393572,HanXRQChr10\_85192350\_85197513:0.0178133881)100:0.0087840814,((HanXRQChr06\_97006962\_97010930:0.0135595629,HanXRQChr03\_159793635\_159795071:0.0091602550)100:0.0091898025,(((HanXRQChr07\_88885423\_88893193:0.0090532900,HanXRQChr08\_109696851\_109697593:0.0045106573)47:0.0000022537,HanXRQChr08\_39439464\_39440150:0.0000022537)100:0

.0275335066,(HanXRQChr01\_140346486\_140347133:0.0234167357,HanXRQChr16\_117883570\_117885696:0.0087504143)99:0.0046367343)95:0.0090987665)100:0.0714830892)91:0.0234078138)90:0.0092273032,HanXRQChr10\_225800164\_225801136:0.0133089061)90:0.0301665687,((HanXRQChr04\_79257170\_79260978:0.0319390567,(HanXRQChr09\_141496442\_141499885:0.0139988872,HanXRQChr03\_70542853\_70547885:0.0231731381)85:0.0000022537)100:0.0311617393,HanXRQChr07\_94262118\_94263107:0.0518137374)88:0.0065847007)82:0.0143631309,(((HanXRQChr17\_170737481\_170744938:0.0113166107,HanXRQChr04\_115339901\_115344808:0.0147664612)88:0.0053907573,HanXRQChr05\_177667685\_177675472:0.0504681683)100:0.0102767789,(((((((HanXRQChr13\_179578065\_179585597:0.0000022537,HanXRQChr13\_179805528\_179808054:0.0000022537)100:0.0137137146,(HanXRQChr05\_64422906\_64424659:0.0045478502,HanXRQChr13\_7315803\_7323380:0.0135493291)99:0.0044186852)56:0.0000022537,HanXRQChr15\_23213675\_23214340:0.0228052294)61:0.0044070563,(HanXRQChr11\_127530325\_127537865:0.0090263545,HanXRQChr12\_23644236\_23645297:0.0136724574)67:0.0000022537)46:0.0000022537,(HanXRQChr14\_116526279\_116533821:0.0045564042,HanXRQChr17\_205323932\_205330231:0.0138261795)75:0.0044685647)92:0.0225303524,(HanXRQChr17\_3057459\_3059571:0.0000022537,((HanXRQChr13\_169241697\_169244853:0.0090040820,HanXRQChr01\_90452614\_90460077:0.0136387140)68:0.0000022537,(HanXRQChr13\_45704069\_45710378:0.0042971425,HanXRQChr08\_22931465\_22937801:0.0006392099)100:0.0040069648)100:0.0044366062)88:0.0000022093)90:0.0270497576,HanXRQChr13\_196274607\_196275703:0.0527428147)100:0.0173905128,((HanXRQChr13\_48436772\_48438877:0.0090047934,(((HanXRQChr15\_129312466\_129317224:0.0044767103,HanXRQChr02\_147809574\_147817424:0.0044639459)57:0.0000022537,(HanXRQChr14\_171031165\_171032099:0.0041667349,HanXRQChr10\_113962499\_113970363:0.0149298002)100:0.0770582218)89:0.0044669191,(HanXRQChr11\_23755532\_23757425:0.0090059764,HanXRQChr01\_4643702\_4650088:0.0044678388)67:0.0000022537)81:0.0000022537)89:0.0089143537,HanXRQChr08\_88222000\_88228288:0.0227268137)97:0.0100097111)94:0.0193299248)100:0.0372671801,HanXRQChr15\_150283897\_150291604:0.0377314519)91:0.0192373827)99:0.0327248123,((HanXRQChr03\_46527653\_46534444:0.0382958344,HanXRQChr06\_51391635\_51395795:0.0240074673)100:0.0027937963,HanXRQChr07\_44435735\_44436200:0.0286052654)100:0.0316110970)99:0.0445196146,HanXRQChr10\_167884487\_167885281:0.0661735505)70:0.0240441886,(((HanXRQChr16\_149753884\_149754258:0.0815051804,HanXRQChr01\_98528860\_98530430:0.0544668906)78:0.0131649248,HanXRQChr16\_128066409\_128067498:0.0581159343)69:0.0161233282,((HanXRQChr02\_20242486\_20243525:0.0302468427,HanXRQChr11\_18762949\_18764264:0.0157866212)100:0.0180052829,HanXRQChr16\_148694596\_148701069:0.0716893932)100:0.0214965049)72:0.0340902223)75:0.0497665583)85:0.0228841739,(((HanXRQChr15\_23293519\_23294345:0.1229441863,(HanXRQChr06\_29856663\_29857319:0.1932839320,HanXRQChr17\_60426850\_60428287:0.8422193739)100:0.3500909999)79:0.0338930771,((((((((((((((((HanXRQChr07\_30137334\_30143115:0.0089208664,HanXRQChr15\_6435740\_6441546:0.0000027400)87:0.0000021495,HanXRQChr05\_211734084\_211734739:0.044571527)100:0.0359942280,HanXRQChr04\_4816946\_4817774:0.0508628527)67:0.0000020300,HanXRQChr09\_90613212\_90613775:0.0472948579)100:0.0708833527,((HanXRQChr14\_164972043\_164972420:0.0175835319,(HanXRQChr17\_171676962\_171677479:0.0090318824,(HanXRQChr04\_11014761\_11015279:0.0135654294,HanXRQChr04\_11235868\_11236386:0.0135678529)100:0.0044128735)100:0.0049064262)100:0.0133940352,HanXRQChr10\_36325

499\_36326037:0.0142633882)100:0.0492108242)97:0.0111956150,(HanXRQChr09\_16583017\_16583476:0.0103582110,HanXRQChr02\_53194187\_53194755:0.0174603185)100:0.1000819988)69:0.0050945851,HanXRQChr15\_58262815\_58263268:0.1299931075)52:0.0185698062,(((HanXRQChr03\_53881858\_53882406:0.0089612650,HanXRQChr15\_50520164\_50520709:0.0000022537)100:0.0042080467,HanXRQChr08\_58106590\_58107151:0.0138410050)100:0.0673878372,HanXRQChr04\_117734534\_117735067:0.0810556833)68:0.0000022969,HanXRQChr07\_39909716\_39910258:0.1079378518)58:0.0142608418,HanXRQChr11\_114599910\_114600468:0.0993873825)53:0.0029748145,((HanXRQChr08\_102456485\_102456998:0.0813073316,(HanXRQChr03\_6367591\_6368162:0.1359892544,(HanXRQChr08\_32332017\_32332576:0.0000022537,HanXRQChr05\_142623602\_142624161:0.0000022537)100:0.0888961679)95:0.0308956819)95:0.0228907912,(((HanXRQChr10\_160816414\_160816781:0.0132081621,HanXRQChr09\_205724496\_205724897:0.0281169000)99:0.0400324403,HanXRQChr05\_5609714\_5610098:0.2033338952)57:0.0000028730,HanXRQChr16\_19443969\_19444339:0.1007433170)100:0.1956087268)60:0.0072040374)34:0.0000022690)37:0.0066493205,(((HanXRQChr01\_65087231\_65087766:0.0135357449,HanXRQChr10\_26225253\_26225786:0.0089658529)100:0.0281466671,HanXRQChr09\_6730323\_6730857:0.0342596042)100:0.0485612260,HanXRQChr04\_145024358\_145024790:0.0771889056)98:0.0251597714,HanXRQChr12\_103007227\_103007661:0.1259688050)96:0.0324699631)35:0.0030985292,(((HanXRQChr08\_56688339\_56688696:0.0181768478,(((HanXRQChr03\_150064680\_150065184:0.0000000000,HanXRQChr10\_93521599\_93522103:0.0000000000):0.0000022537,HanXRQChr03\_126121322\_126121826:0.0000022537)61:0.0000022537,HanXRQChr10\_78375584\_78376088:0.0044870128)100:0.0189623566)96:0.0046258632,HanXRQChr07\_12736562\_12737068:0.0000022537)100:0.0394968497,HanXRQChr05\_164461706\_164462192:0.0534193495)100:0.0700702430,(((HanXRQChr13\_134302109\_134302509:0.0000022537,(HanXRQChr10\_95181243\_95181772:0.0000022537,HanXRQChr17\_160614824\_160615353:0.0000022537)100:0.0133393228)100:0.0264363052,(((HanXRQChr17\_13361200\_13361728:0.0178877985,((HanXRQChr12\_75917343\_75917873:0.0044172404,HanXRQChr14\_86341928\_86342457:0.0000022537)100:0.0136216824,HanXRQChr03\_99988684\_99989213:0.0320018857)100:0.0042671133)100:0.0044846487,HanXRQChr17\_99228227\_99228757:0.0179502554)100:0.0080835099,(HanXRQChr16\_15638745\_15639274:0.0088693812,HanXRQChr05\_144936503\_144937032:0.0000022537)100:0.0052332624)92:0.0044255580)51:0.0000022537,HanXRQChr02\_114840517\_114841046:0.0279745144)100:0.0920021237)55:0.0097280869,(((HanXRQChr11\_55711325\_55711859:0.1035322840,(HanXRQChr01\_29157382\_29157877:0.1268497522,HanXRQChr13\_104941607\_104942137:0.1325712877)98:0.0273235857)73:0.0196876949,(HanXRQChr08\_25571094\_25571648:0.0165529013,HanXRQChr05\_44360152\_44360708:0.0412843691)100:0.1094144289)66:0.0132666048,HanXRQChr10\_187118315\_187118736:0.1576481834)53:0.0068269517)56:0.0229910105)47:0.0049925789,((HanXRQChr09\_8264746\_8265314:0.0267404261,HanXRQChr16\_71647538\_71648109:0.0155378164)100:0.0445479216,(HanXRQChr13\_88688183\_88688669:0.0917222415,HanXRQChr17\_31920748\_31921235:0.0213933895)100:0.1322491446)77:0.0136853704)42:0.0000025268,((HanXRQChr17\_84099735\_84100241:0.0654028399,HanXRQChr10\_11267406\_11267923:0.1009088358)99:0.0210591800,(HanXRQChr02\_131243878\_131244246:0.0000022537,HanXRQChr10\_168209872\_168210240:0.0044404989)100:0.0792321392)84:0.0190850683)57:0.0534881399,((HanXRQChr08\_113839738\_113840105:0.0182204896,HanXRQChr04\_28158629\_28159233:0.0044831219)96:0.0043706095,HanXRQChr11\_3983079



2\_39831397:0.0046679970)100:0.1571211030)90:0.0595871853,(((HanXRQChr11\_13379260  
9\_133792984:0.0000022537,HanXRQChr11\_133775764\_133776143:0.0000022537)100:0.035  
6166811,HanXRQChr05\_62558786\_62559318:0.0255330495)100:0.0222587719,(HanXRQChr  
09\_124910897\_124911250:0.0049652384,HanXRQChr11\_30817527\_30817892:0.017464261  
6)100:0.1457239988)100:0.0400045323)64:0.0214460846,(HanXRQChr17\_68193643\_681941  
42:0.0273253482,HanXRQChr11\_94539491\_94539990:0.0136412292)100:0.1206937594)80:0  
.0246065435,((((HanXRQChr01\_40849696\_40850225:0.0328551868,HanXRQChr11\_135844  
467\_135845030:0.0130429050)90:0.0000022553,(HanXRQChr16\_45835607\_45836135:0.017  
3236752,HanXRQChr04\_141436125\_141436654:0.0188198338)100:0.0176600961)100:0.087  
3597603,HanXRQChr14\_73178118\_73178607:0.1877602841)79:0.0170346448,(HanXRQChr0  
9\_74883466\_74883949:0.0208696681,HanXRQChr05\_179907532\_179908035:0.0342951744)  
100:0.1154671547)41:0.0115531844,(HanXRQChr10\_170724767\_170725228:0.0770535952,(  
HanXRQChr11\_114441513\_114442047:0.0455348797,HanXRQChr08\_22016304\_22016849:0  
.0676965626)98:0.0181142225)95:0.0211556127)25:0.0000029206)39:0.0073887990,(HanXR  
QChr09\_48002641\_48003124:0.0000022537,HanXRQChr09\_48019973\_48020456:0.0000022  
537)100:0.1666970942)34:0.0044908782,((((((((HanXRQChr17\_93185904\_93186267:0.0044  
886246,HanXRQChr17\_93126497\_93127118:0.0090084712)56:0.0000022537,HanXRQChr17  
\_93164704\_93165330:0.0182835863)100:0.0225515785,((((HanXRQChr04\_162198911\_1621  
99522:0.0044781802,HanXRQChr17\_31095021\_31095488:0.0092017795)100:0.0182103604,(  
HanXRQChr16\_139484437\_139485058:0.0135378053,(HanXRQChr06\_73271993\_73272461:  
0.0136794096,(HanXRQChr17\_13434430\_13434837:0.0183424386,(HanXRQChr05\_1714327  
14\_171433335:0.0089641474,HanXRQChr02\_40423347\_40423968:0.0136530612)87:0.00000  
26456)100:0.0136903227)76:0.0000024927,HanXRQChr10\_144765081\_144765648:0.090942  
9748)93:0.0000029767)60:0.0000025735)89:0.0048349209,((((HanXRQChr13\_193729788\_19  
3730410:0.0045119723,HanXRQChr02\_111025526\_111026149:0.0044726689)100:0.0089731  
454,HanXRQChr01\_83910798\_83911405:0.0321259414)93:0.0000023240,(HanXRQChr14\_28  
912143\_28912767:0.0376457070,HanXRQChr11\_61241453\_61242074:0.0468375832)48:0.00  
00022537)84:0.0045373629,(HanXRQChr15\_64901712\_64902075:0.0000022537,HanXRQChr  
04\_57314850\_57315475:0.0000022537)100:0.0180916675)41:0.0000022537,HanXRQChr02\_  
40199887\_40200279:0.0229112466)82:0.0045383474)51:0.0000028899,HanXRQChr07\_9417  
4100\_94174724:0.0227027255)35:0.0000028899)28:0.0000025735,HanXRQChr17\_13932269  
1\_139323166:0.0416709301)63:0.0043749888,(((HanXRQChr10\_145087013\_145087418:0.01  
84554315,HanXRQChr10\_175382210\_175382618:0.0137516378)100:0.0138772329,HanXRQ  
Chr06\_56355680\_56356069:0.0473578439)100:0.0094668784,(HanXRQChr17\_95938863\_95  
939232:0.0281952503,HanXRQChr13\_144225259\_144225863:0.0139789895)99:0.046330781  
8)93:0.0044614283)100:0.1505179436,((((HanXRQChr15\_52286990\_52287513:0.1071387594  
,(HanXRQChr09\_19029933\_19030470:0.0000022537,HanXRQChr09\_126494259\_126494796:  
0.0045066905)100:0.0096266614)100:0.0033667372,HanXRQChr06\_41524728\_41525252:0.0  
262370732)100:0.0748050329,(HanXRQChr03\_26626677\_26627224:0.0349702369,HanXRQ  
Chr12\_100245888\_100246277:0.0165366065)100:0.0359624588)86:0.0012226583,HanXRQC  
hr14\_47500657\_47501050:0.2172338890)96:0.0192836700)92:0.0288603653,((((((((HanXRQ  
Chr14\_79508506\_79508881:0.0000022537,HanXRQChr15\_145112060\_145112588:0.0090526  
989)99:0.0090109593,HanXRQChr09\_159439793\_159440170:0.0277157434)100:0.00454099  
37,HanXRQChr14\_45570798\_45571311:0.0236404762)55:0.0000022537,(HanXRQChr16\_170

010412\_170010812:0.0276482280,HanXRQChr01\_83270623\_83271135:0.0182907547)100:0.0044253086)100:0.0096499194,HanXRQChr10\_173822886\_173823254:0.0691380201)77:0.0040435443,HanXRQChr04\_147140553\_147141079:0.0091115300)75:0.0046470382,((HanXRQChr09\_59706805\_59707181:0.0262301631,HanXRQChr04\_65301484\_65302016:0.0425977899)94:0.0057049409,HanXRQChr07\_35619467\_35619941:0.0702092494)85:0.0049376210)46:0.0000028899,HanXRQChr02\_46053364\_46053773:0.0135815773)59:0.0014912951,HanXRQChr10\_100532038\_100532438:0.0356718862)100:0.0742665771)53:0.0055089432,(HanXRQChr15\_125481128\_125481695:0.0219564806,HanXRQChr10\_140012131\_140012699:0.0056875489)100:0.1593110287)93:0.0316511075,(HanXRQChr15\_153093160\_153093558:0.1306533000,HanXRQChr11\_77517539\_77518062:0.0919349496)94:0.0331140556)85:0.0203971780,(HanXRQChr17\_54907212\_54907721:0.0286221578,HanXRQChr09\_50143993\_50144471:0.0362435551)100:0.0991728469)33:0.0000024974,HanXRQChr07\_67769\_68326:0.0952083580)40:0.0096717969)48:0.0077499639,HanXRQChr10\_170627841\_170628410:0.1044525463)53:0.0691731378,HanXRQChr13\_127794694\_127795300:0.1289255920)100:1.5637117117)89:0.0374179065,HanXRQChr12\_94877770\_94878735:0.1677817554)89:0.0444780061)100:0.5112641593)93:0.0860371938)94:0.0719050964)50:0.0113733593,((((((((((((HanXRQChr16\_150636591\_150640613:0.0223628486,(((HanXRQChr17\_47637609\_47642782:0.0128816587,HanXRQChr09\_42030904\_42038738:0.0232025185)92:0.0000022537,HanXRQChr08\_88220498\_88221890:0.0042288772)100:0.0083642507,HanXRQChr15\_74394306\_74402182:0.0176361072)100:0.0133201998)100:0.0234283600,HanXRQChr05\_177102059\_177102727:0.0081816387)98:0.0156238353,HanXRQChr05\_199634091\_199642069:0.0042763879)98:0.0040474873,HanXRQChr09\_26818251\_26820777:0.0304360786)99:0.0204372718,HanXRQChr03\_34702985\_34703845:0.0400066685)70:0.0037010861,((HanXRQChr17\_164543226\_164545213:0.0040630079,(HanXRQChr11\_5059413\_5062302:0.0000022537,HanXRQChr16\_159464039\_159466946:0.0000022537)100:0.0122053373)93:0.0000022537,((HanXRQChr04\_4585394\_4586317:0.0130870475,HanXRQChr12\_8060455\_8064354:0.0000022537)100:0.0043151508,HanXRQChr04\_4414273\_4418183:0.0086004036)100:0.0556171618)100:0.0205390342)97:0.0154497777,(((HanXRQChr16\_154231921\_154234094:0.0438290566,(HanXRQChr10\_201208107\_201211833:0.0167186388,HanXRQChr06\_1335657\_1337253:0.0350255811)100:0.0057250662)100:0.0267046621,((HanXRQChr09\_1135754\_1136217:0.0045353280,HanXRQChr09\_1132214\_1133064:0.0084705586)100:0.1176414203,(HanXRQChr14\_171048254\_171055488:0.0681054474,HanXRQChr02\_147305501\_147307299:0.0616391530)100:0.1097463175)99:0.0761454683)95:0.0167380829,(HanXRQChr06\_47763415\_47764638:0.0362247599,HanXRQChr12\_40589262\_40592252:0.0415001997)100:0.0425572453)96:0.0113887655)100:0.0191233544,HanXRQChr05\_52352508\_52353847:0.0507640161)96:0.0222411527,HanXRQChr12\_66452661\_66454107:0.0643049151)100:0.0195248039,HanXRQChr03\_153476779\_153477741:0.0638817300)100:0.0673121450,HanXRQChr09\_192317181\_192318492:0.0560190304)99:0.0132681331,HanXRQChr09\_173686390\_173688466:0.1037881310)86:0.0072901181,(HanXRQChr07\_27412393\_27412825:0.0085723519,HanXRQChr07\_27480885\_27481317:0.0000022537)100:0.4689795141)79:0.0239257730)95:0.0336765725,((HanXRQChr10\_167996501\_167997306:0.0374874565,(HanXRQChr07\_94263537\_94264736:0.0149143520,((((HanXRQChr10\_200122501\_200126511:0.0082952381,HanXRQChr03\_159773788\_159776353:0.0084195845)100:0.0089485771,HanXRQChr16\_117885695\_117887257:0.0102602554)100:0.0201582230,HanXRQChr16\_139387141\_139394695:0.0079149475)85:0.0000028848,HanXRQChr13\_70

292420\_70293133:0.0229115940)100:0.0375175887)100:0.0683769939)100:0.0965836300,(((  
(((HanXRQChr12\_74630615\_74638291:0.0301744600,(HanXRQChr05\_32799874\_32806012:  
0.0176222204,HanXRQChr05\_66536036\_66536958:0.0222732528)100:0.0061668589)100:0.0  
471234159,(HanXRQChr09\_42108185\_42108601:0.0219502331,((HanXRQChr14\_70675600\_  
70678361:0.0043275119,(HanXRQChr14\_79208902\_79211665:0.0130349843,HanXRQChr14  
\_77501682\_77504443:0.0086699495)91:0.0000022537)99:0.0000028315,HanXRQChr02\_175  
774663\_175777915:0.0173998122)100:0.0043522188)100:0.0057597173)99:0.0453470725,H  
anXRQChr08\_40489307\_40491198:0.0722352566)100:0.0755821603,(HanXRQChr09\_18485  
6661\_184857251:0.0288868652,HanXRQChr13\_144823475\_144824100:0.0244184086)100:0.  
0924244817)81:0.0254552167,(HanXRQChr15\_104285615\_104286058:0.0515583482,HanXR  
QChr05\_209135841\_209137273:0.0759217992)100:0.0448487230)57:0.0123794674,HanXRQ  
Chr16\_128055830\_128059471:0.2006414027)63:0.0282876229)100:0.0958886501)100:0.061  
1756233)99:0.0516603092)93:0.0000022577,HanXRQChr11\_34832223\_34833041:0.0337481  
115)98:0.0020456245,HanXRQChr03\_69429483\_69433013:0.0155996365)100:0.0116783118)  
55:0.0000022577)100:0.0139214353,HanXRQChr04\_162448231\_162451209:0.0312972994)1  
00:0.0322144654)100:0.0231282103,(HanXRQChr13\_159695079\_159696066:0.0176624069,  
HanXRQChr06\_34593592\_34601130:0.0085955876)100:0.0193114800)100:0.0351361834,(((  
((HanXRQChr07\_27634064\_27638140:0.0000022537,HanXRQChr05\_64416693\_64422326:0.  
0086639752)99:0.0000022537,(HanXRQChr15\_23210956\_23213675:0.0043518605,HanXRQ  
Chr11\_69846093\_69853687:0.0043551286)99:0.0087133407)85:0.0042855265,(HanXRQChr0  
6\_20451348\_20451704:0.0000022537,HanXRQChr13\_179591469\_179595652:0.0087166205)  
97:0.0000022537)98:0.0086505941,(((HanXRQChr12\_45905678\_45909951:0.0000022537,Ha  
nXRQChr15\_74224040\_74228313:0.0000022537)100:0.0086658054,HanXRQChr13\_2986278  
\_2987762:0.0043211168)67:0.0000022537,HanXRQChr02\_4724981\_4726023:0.0000022537)  
67:0.0000022537)80:0.0000022537,HanXRQChr13\_135223336\_135224153:0.0358325713)10  
0:0.0152305706,HanXRQChr13\_196286900\_196290049:0.0117574502)100:0.0305133011)98:  
0.0158379017);

#### TIME STAMP

-----

Date and time: Wed Mar 11 09:47:29 2020

Total CPU time used: 1543.728984 seconds (0h:25m:43s)

Total wall-clock time used: 1550.515339 seconds (0h:25m:50s)
